# Supplementary material
Source: PubMed Central journal article supplement (PMC5485656)
Supplement: NIHMS868040-supplement-1.pdf [file NIHMS868040-supplement-1.pdf]

## ***Supporting Information***

*For*

### **Organocatalyzed Atom Transfer Radical Polymerization Using *N*-Aryl Phenoxazines as Photoredox Catalysts**

Ryan M. Pearson,<sup>a</sup> Chern-Hooi Lim,<sup>a</sup> Blaine G. McCarthy,<sup>a</sup> Charles B. Musgrave,<sup>a,b,c</sup> Garret M. Miyake<sup>a,c</sup>

<sup>a</sup>Department of Chemistry and Biochemistry, <sup>b</sup>Department of Chemical and Biological Engineering, <sup>c</sup>Materials Science and Engineering Program, University of Colorado Boulder, Boulder, Colorado 80309, USA.

\*Corresponding author, E-mail: garret.miyake@colorado.edu

## Table of Contents

|                                                                                                                        |    |
|------------------------------------------------------------------------------------------------------------------------|----|
| 1. Materials and Methods .....                                                                                         | 3  |
| 2. Procedures .....                                                                                                    | 4  |
| Synthesis of <i>N</i> -aryl phenoxazine catalysts: .....                                                               | 4  |
| Control experiments .....                                                                                              | 21 |
| General procedure for O-ATRP of MMA using a UV light source .....                                                      | 21 |
| Monomer scope .....                                                                                                    | 22 |
| General procedure for chain extension of poly methyl methacrylate with various monomers by photocatalyzed O-ATRP ..... | 22 |
| General procedure for O-ATRP of MMA using a visible light source .....                                                 | 23 |
| 3. Characterization of Catalysts' Photoredox Properties.....                                                           | 24 |
| UV-vis absorption spectroscopy .....                                                                                   | 24 |
| Fluorescence spectroscopy .....                                                                                        | 26 |
| Cyclic voltammetry .....                                                                                               | 27 |
| Experimental and theoretical determination of excited state reduction potentials.....                                  | 28 |
| 4. Computational Details .....                                                                                         | 29 |
| 5. Supplemental Polymerization Data.....                                                                               | 30 |
| 6. X-ray Crystallography Data .....                                                                                    | 33 |
| 1-Naphthalene-10-phenoxazine .....                                                                                     | 34 |
| 1-Naphthalene-10-phenothiazine .....                                                                                   | 40 |
| 7. Coordinates of Molecular Structures.....                                                                            | 46 |
| 10-Phenylphenoxazine (1).....                                                                                          | 46 |
| 4-Trifluoromethylphenyl -10-phenoxazine (2).....                                                                       | 48 |
| 1-Naphthalene-10-phenoxazine (3) .....                                                                                 | 51 |
| 2-Naphthalene-10-phenoxazine (4) .....                                                                                 | 53 |
| 3,7-Di(4-biphenyl)1-Naphthalene-10-Phenoxazine (5) .....                                                               | 56 |
| 10-Phenylphenothiazine.....                                                                                            | 61 |
| 1-Naphthalene-10-phenothiazine .....                                                                                   | 64 |
| 10-Phenylphenoxazine (from X-ray crystal analysis) .....                                                               | 66 |
| 10-Phenylphenothiazine (from X-ray crystal analysis).....                                                              | 67 |
| 8. References .....                                                                                                    | 70 |

## 1. Materials and Methods

Phenoxazine was purchased from Beantown Chemical. 4-biphenyl boronic acid was purchased from TCI America. Glacial acetic acid was purchased from VWR. All other reagents were purchased from Sigma-Aldrich. Chemicals used in polymerizations, including isobutyl methacrylate (BMA), benzyl methacrylate (BnMA), isodecyl methacrylate (IDMA), methyl methacrylate (MMA), diethyl 2-bromo-2-methyl malonate (DBMM), dimethylacetamide (DMA) were purified by vacuum distillation followed by three freeze-pump-thaw cycles and stored under nitrogen atmosphere. Dioxane was purified using an mBraun MB-SPS-800 solvent purification system and kept under nitrogen atmosphere. Dicyclohexylphosphino-2,6-diisopropoxybiphenyl (RuPhos) and chloro-(2-dicyclohexylphosphino-2,6-diisopropoxy-1,1-biphenyl) [2-(2-aminoethyl)phenyl] palladium(II) - methyl-t-butyl ether adduct (RuPhos precatalyst) were stored under nitrogen atmosphere and used as received. Aryl halides used in the catalyst synthesis were degassed and stored under nitrogen. A Vogue Professional Powerful & Double Wide 54 watt UV lamp Light Nail Dryer was used as the UV light source. One sixteen inch strip of double-density white LEDs, purchased from Creative Lighting Solutions (item no. CL-FRS1210-5M-12V-WH), was wrapped inside a 400 mL beaker and used as a visible light source.

Nuclear magnetic resonance spectra were recorded on a Varian 300 MHz NMR Spectrometer for polymerization conversions and using a Varian 400 MHz or Varian 500 MHz NMR Spectrometer for all other characterizations. All  $^1\text{H}$  NMR experiments are reported in  $\delta$  units, parts per million (ppm), and were measured relative to the signals for residual chloroform (7.26 ppm) or benzene (7.15 ppm) in the deuterated solvent. All  $^{13}\text{C}$  NMR spectra are reported in ppm relative to  $\text{CDCl}_3$  (77.23 ppm) or  $\text{C}_6\text{D}_6$  (128.62 ppm). Analysis of polymer molecular weights was performed via gel permeation chromatography (GPC) coupled with multi-angle light scattering (MALS), using an Agilent HPLC fitted with one guard column, three PLgel 5  $\mu\text{m}$  MIXED-C gel permeation columns, a Wyatt Technology TrEX differential refractometer, and a Wyatt Technology miniDAWN TREOS light scattering detector, using THF as the eluent at a flow rate of 1.0 mL/min. Ultraviolet-visible spectroscopy was performed on an Cary 5000 spectrophotometer using DMA as the solvent. Emission spectroscopy was performed on a SLM 8000C spectrofluorimeter using DMA as the solvent. Cyclic voltammetry was performed with a CH Instruments electrochemical analyzer with a  $\text{Ag}/\text{AgNO}_3$  (0.01 M in MeCN) reference electrode using DMA as the solvent for the working electrode. Samples were sparged with argon for 5 minutes prior to both emission and electrochemical measurements.

## 2. Procedures

### Synthesis of *N*-aryl phenoxazine catalysts:

#### 10-Phenylphenoxazine (1)

A 50 mL storage flask was charged with a stir bar, flame dried under vacuum and back filled with nitrogen three times. The flask was then charged with phenoxazine (183 mg, 1.0 mmol, 1.00 eq.), NaO<sup>t</sup>Bu (192.2 mg, 2.0 mmol, 2.00 eq.), and RuPhos (12 mg, 0.03 mmol, 0.03 eq.). The flask was taken into a nitrogen filled glovebox where RuPhos Precat (21mg, 0.03 mmol, 0.03 eq.), 1 mL dry dioxane and bromobenzene (0.11 mL, 2.0 mmol 2.00 eq.) were added. The flask was placed in an oil bath at 130° C while stirring for 48 hours. The flask was then cooled to room temperature, diluted with CH<sub>2</sub>Cl<sub>2</sub>, and the solution was washed with water three times, brine once, dried over MgSO<sub>4</sub> and purified by recrystallization from CH<sub>2</sub>Cl<sub>2</sub> layered with hexanes at - 25° C to give 60 mg of yellow crystals, 23% yield. NMR matched that reported previously.<sup>1</sup>

#### 4-Trifluoromethylphenyl -10-phenoxazine (2)

A 100 mL storage flask was charged with a stir bar, flame dried under vacuum and back filled with nitrogen three times. The flask was then charged with phenoxazine (800 mg, 4.37 mmol, 1.00 eq.), NaO<sup>t</sup>Bu (840 mg, 8.74 mmol, 2.00 eq.), and RuPhos (52.4 mg, 0.13 mmol, 0.03 eq.). The flask was placed into a nitrogen filled glovebox where RuPhos Precat (91.77 mg, 0.13 mmol, 0.03 eq.), and 4 mL dry dioxane and 4-bromobenzotrifluoride (1.22 mL, 8.74 mmol, 2.00 eq.) were added. The flask was placed in an oil bath at 130° C while stirring for 48 hours. The flask was then cooled to room temperature, diluted with CH<sub>2</sub>Cl<sub>2</sub>, and the solution was washed with water three times, brine once, dried over MgSO<sub>4</sub> and purified by recrystallization from CH<sub>2</sub>Cl<sub>2</sub> layered with hexanes on top at - 25° C to yield 987 mg of yellow crystals, 69% yield. Final purification was conducted via sublimation at 100 mTorr at 175° C. <sup>1</sup>H NMR (CDCl<sub>3</sub>, 500 MHz) δ 7.87 (d, *J* = 8.20 Hz, 2H), 7.51 (d, *J* = 8.15 Hz, 2H), 6.73 (dd, *J* = 7.85, 1.75 Hz, 2H), 6.68 (m, 2H), 6.62 (td, *J* = 7.85, 1.75 Hz, 2H), 5.90 (d, *J* = 8.20 Hz, 2H). <sup>13</sup>C NMR (CDCl<sub>3</sub>, 400MHz) δ 144.10, 142.73, 133.89, 131.76, 130.97, 130.64, 128.44, 123.52, 122.09, 115.93, 113.39. <sup>19</sup>F NMR (CDCl<sub>3</sub>, 300MHz) δ 62.55. HRMS (ESI): calculated for M+ C<sub>19</sub>H<sub>12</sub>F<sub>3</sub>NO, 327.0871; observed 327.0869.

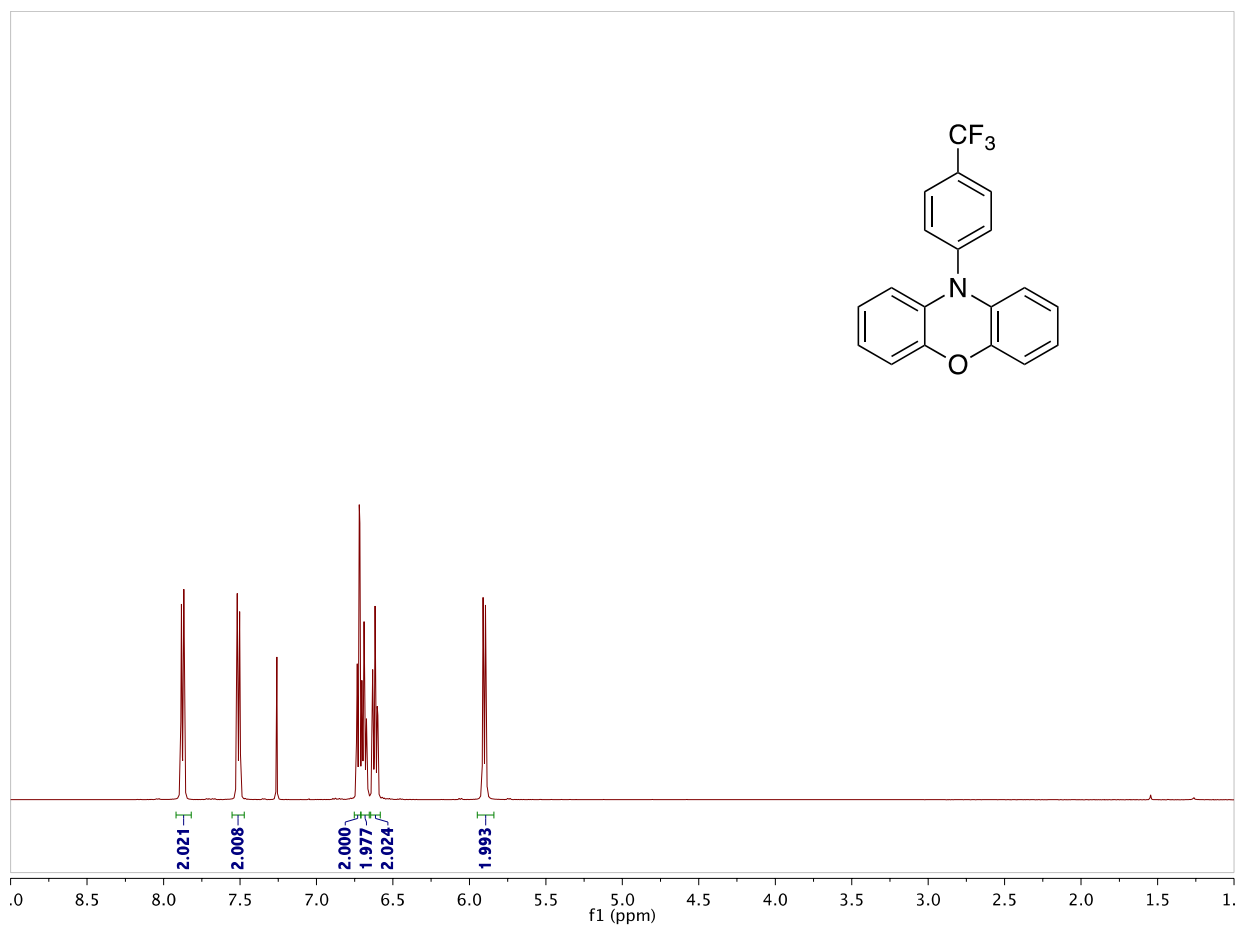

**Figure S1.** <sup>1</sup>H NMR of 4-Trifluoromethylphenyl-10-phenoxazine in CDCl<sub>3</sub>.

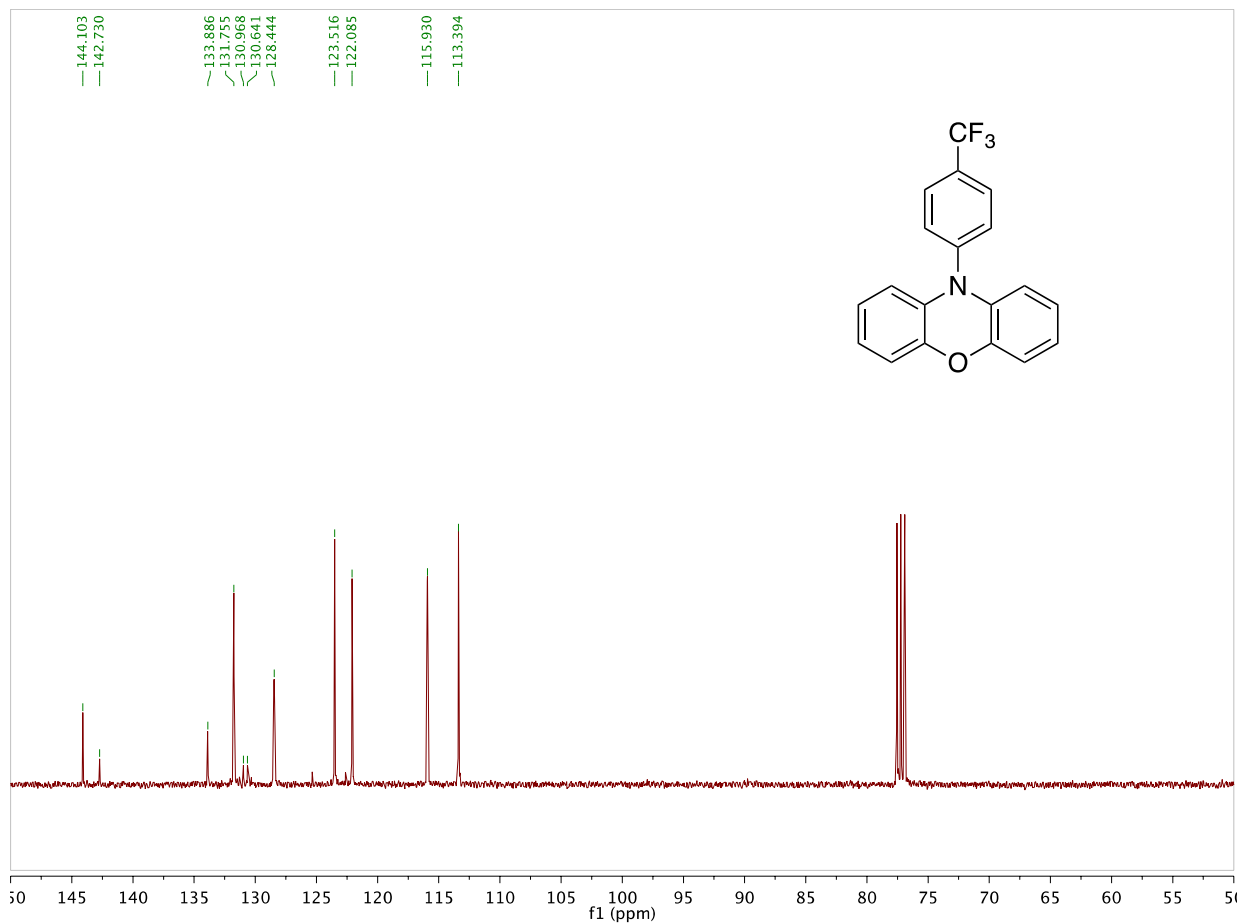

**Figure S2.** <sup>13</sup>C NMR of 4-Trifluoromethylphenyl-10-phenoxazine in CDCl<sub>3</sub>.

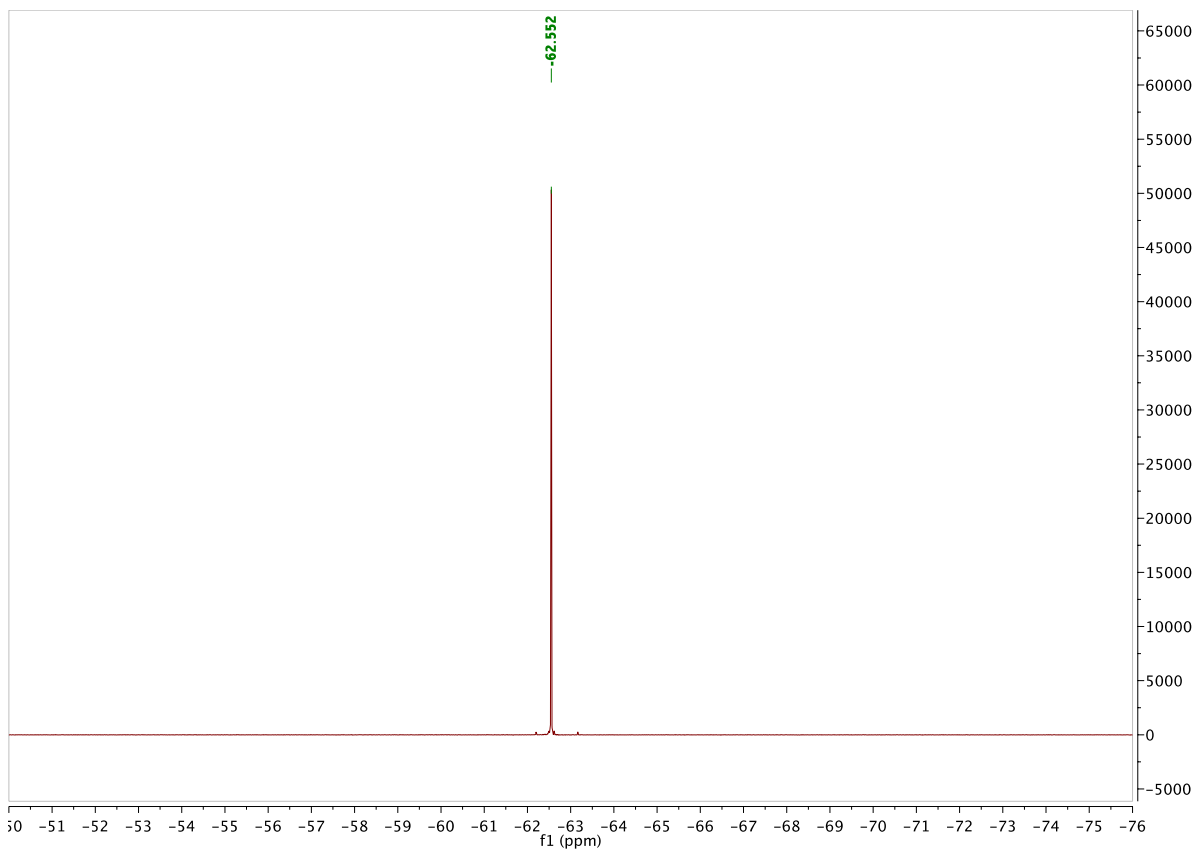

**Figure S3.**  $^{19}\text{F}$  NMR of 4-Trifluoromethylphenyl-10-phenoxazine in  $\text{CDCl}_3$ .

### 1-Naphthalene-10-phenoxazine (3)

A stir bar was placed into a 100 mL storage flask, flame dried under vacuum and then back filled with nitrogen three times. The flask was then charged with phenoxazine (1.00 g, 5.46 mmol, 1.00 eq.), NaO<sup>t</sup>Bu (1.054 g, 10.92 mmol, 2.00 eq.), and RuPhos (65.6 mg, 0.16 mmol, 0.03 eq.). The flask was taken into a nitrogen filled glovebox where RuPhos Precat (114.75 mg, 0.16 mmol, 0.03 eq.), 6 mL dry dioxane and 1-bromonaphthalene (1.53 mL, 10.92 mmol, 2.00 eq.) were added. The flask was placed in an oil bath at 130° C while stirring for 48 hours. The flask was then cooled to room temperature, diluted with CH<sub>2</sub>Cl<sub>2</sub>, and the solution was washed with water three times, brine once, dried over MgSO<sub>4</sub> and purified by recrystallization from CH<sub>2</sub>Cl<sub>2</sub> layered with hexanes on top at -25° C to yield 790 mg of yellow crystals, 47% yield. Final purification was conducted via sublimation at 100 mTorr at 190° C. <sup>1</sup>H NMR (CDCl<sub>3</sub>, 500 MHz) δ 8.08 (d, *J* = 8.35 Hz, 1H), 7.99 (dd, *J* = 8.20, 3.95 Hz, 2H), 7.66 (t, *J* = 7.25 Hz, 1H), 7.56 (m, 2H), 7.48 (m, 1H), 6.74 (dd, *J* = 7.90, 1.45 Hz, 2H), 6.63 (t, *J* = 7.85 Hz, 2H), 6.49 (td, *J* = 7.85, 1.45 Hz, 2H), 5.71 (dd, *J* = 7.90, 1.45 Hz, 2H). <sup>13</sup>C NMR (CDCl<sub>3</sub>, 400MHz) δ 144.09, 135.77, 135.24, 134.48, 131.56, 129.35, 129.14, 128.95, 127.50, 127.07, 127.04, 123.57, 123.53, 121.47, 115.58, 113.57. HRMS (ESI): calculated for M<sup>+</sup> C<sub>22</sub>H<sub>15</sub>NO, 309.1154; observed 309.1152.



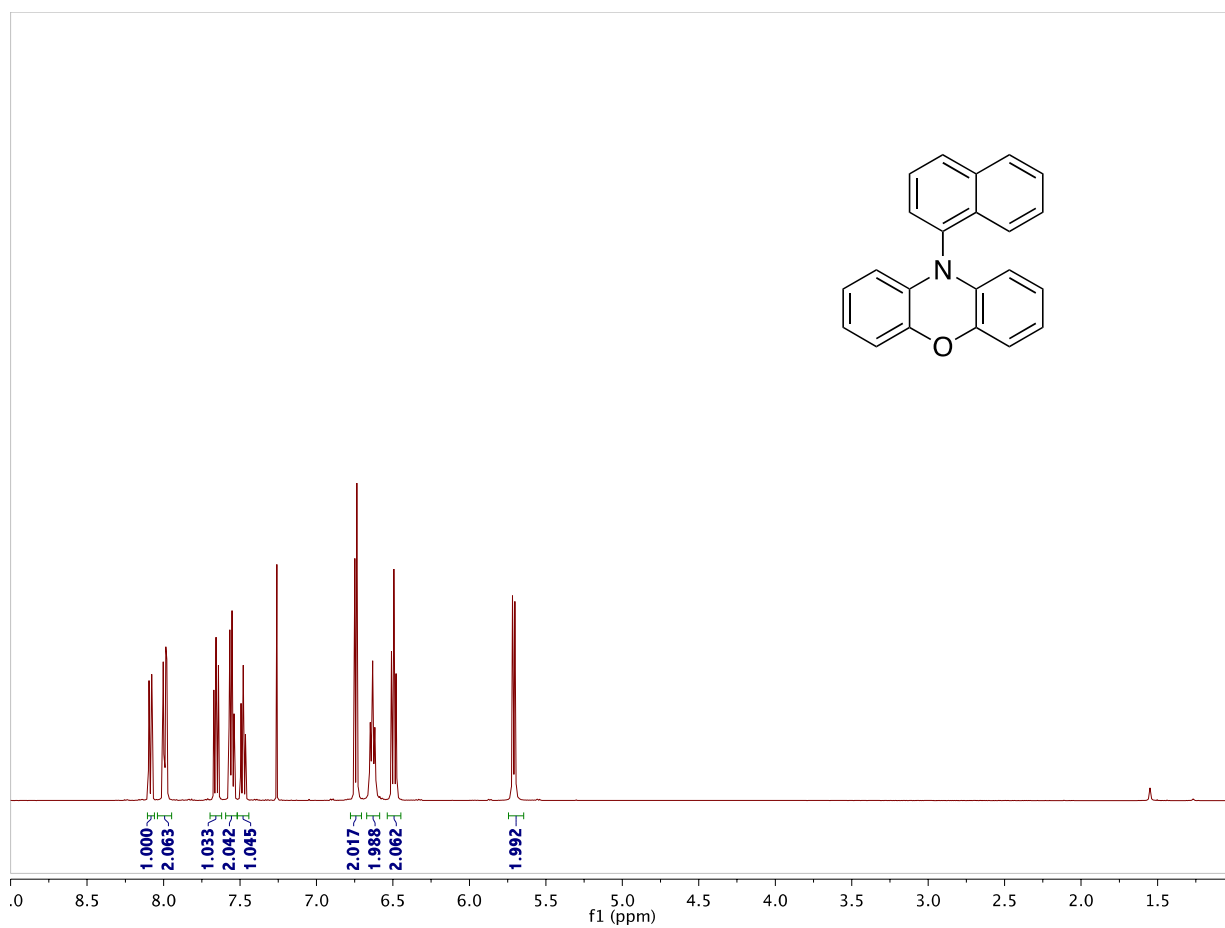

**Figure S4.** <sup>1</sup>H NMR of 1-Naphthalene-10-phenoxazine in CDCl<sub>3</sub>.

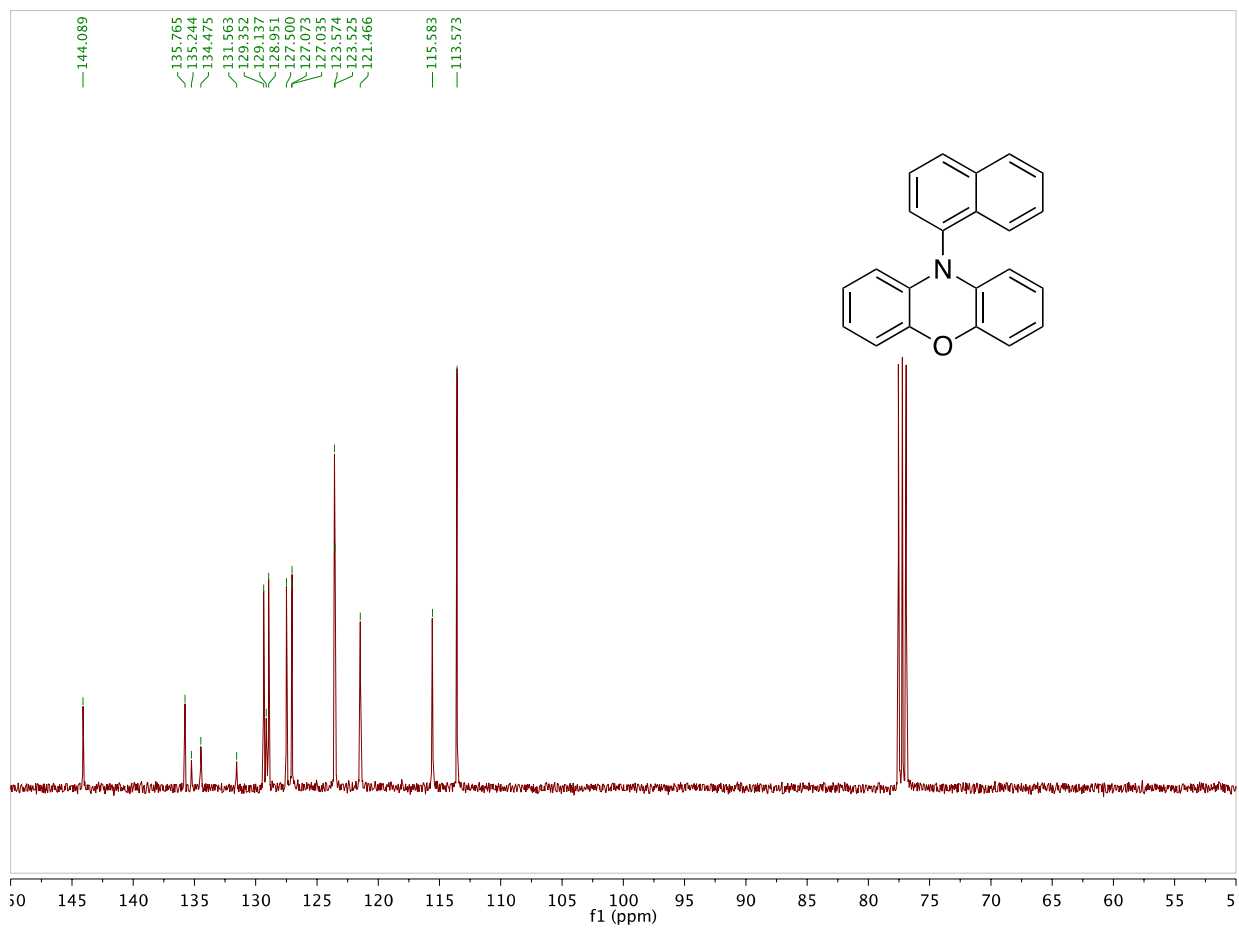

**Figure S5.**  $^{13}\text{C}$  NMR of 1-Naphthalene-10-phenoxazine in  $\text{CDCl}_3$ .

### 2-Naphthalene-10-phenoxazine (4)

A 100 mL storage flask was charged with a stir bar, flame dried under vacuum then back filled with nitrogen three times. The flask was then charged with phenoxazine (1.00 g, 5.46 mmol, 1.00 eq.), NaO<sup>t</sup>Bu (1.054 g, 10.92 mmol, 2.00 eq.), and RuPhos (65.6 mg, 0.16 mmol, 0.03 eq.). The flask was taken into a nitrogen filled glovebox where RuPhos Precat (114.75 mg, 0.16 mmol, 0.03 eq.), 6mL dry dioxane and 2-bromonaphthalene (2.26 mg, 10.92 mmol, 2.00 eq.) were added. The flask was placed in an oil bath at 130° C while stirring for 48 hours. The flask was then cooled to room temperature, diluted with CH<sub>2</sub>Cl<sub>2</sub>, and the solution was washed with water three times, brine, dried over MgSO<sub>4</sub> and purified by recrystallization from CH<sub>2</sub>Cl<sub>2</sub> at -25° C to yield 890 mg of light yellow, flakey crystals, 53% yield. Final purification was conducted via sublimation at 100 mTorr at 195° C. <sup>1</sup>H NMR (CDCl<sub>3</sub>, 400 MHz) δ 8.08 (d, *J* = 8.60 Hz, 1H), 7.95 (d, *J* = 7.00 Hz, 1H), 7.88 (m, 2H), 7.57 (m, 2H), 7.42 (dd, *J* = 8.64, 2.04 Hz, 1H), 6.73 (dd, *J* = 7.84, 1.56 Hz, 2H), 6.66 (t, *J* = 7.52, 2H), 6.57 (td, *J* = 8.12, 1.60 Hz, 2H), 5.99 (d, *J* = 7.96, 2H). <sup>13</sup>C NMR (CDCl<sub>3</sub>, 400 MHz) δ 144.42, 136.74, 135.06, 134.78, 133.28, 131.55, 130.29, 128.23, 128.15, 127.12, 126.78, 123.49, 121.66, 115.74, 113.78. HRMS (ESI): calculated for M<sup>+</sup> C<sub>22</sub>H<sub>15</sub>NO, 309.1154; observed 309.1151.

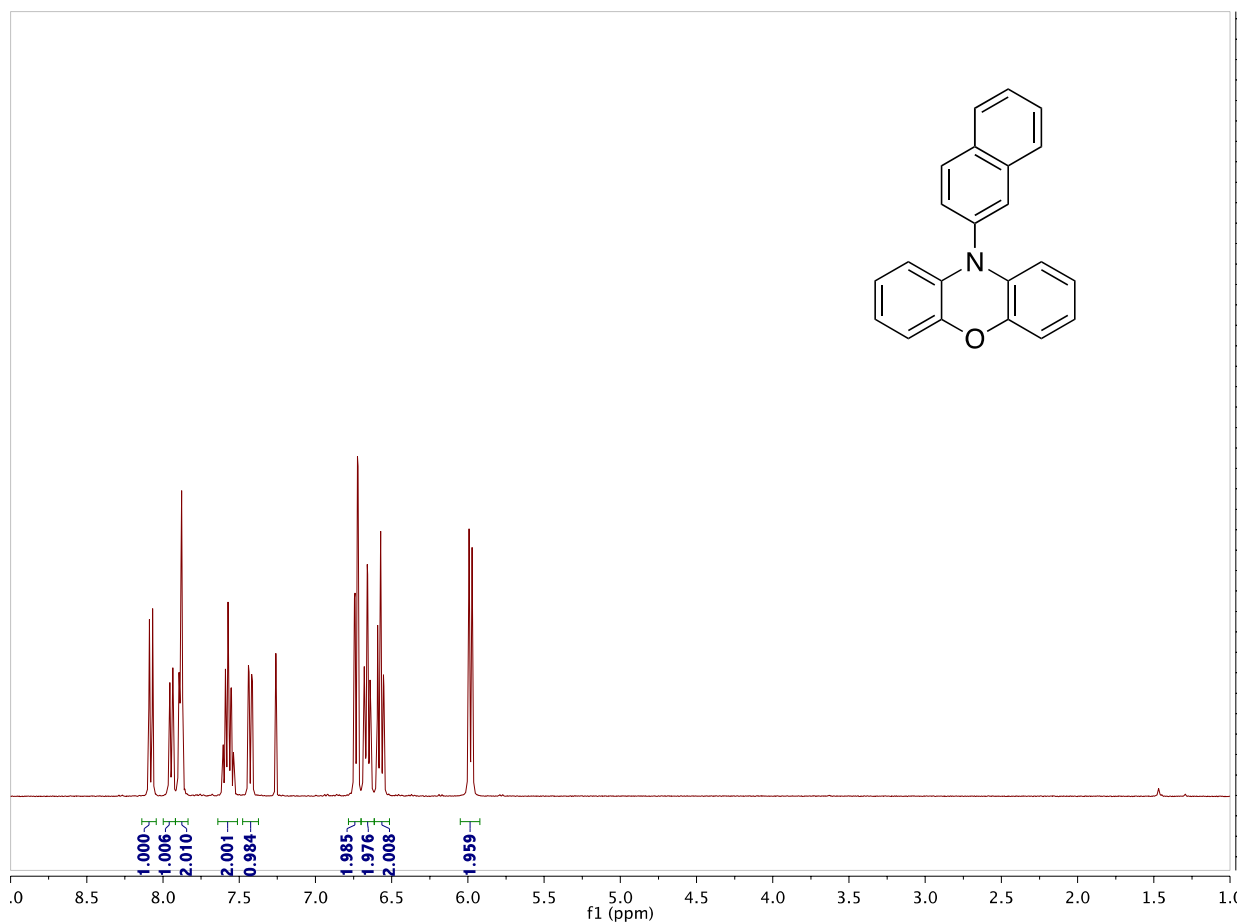

**Figure S6.** <sup>1</sup>H NMR of 2-Naphthalene-10-phenoxazine in CDCl<sub>3</sub>.

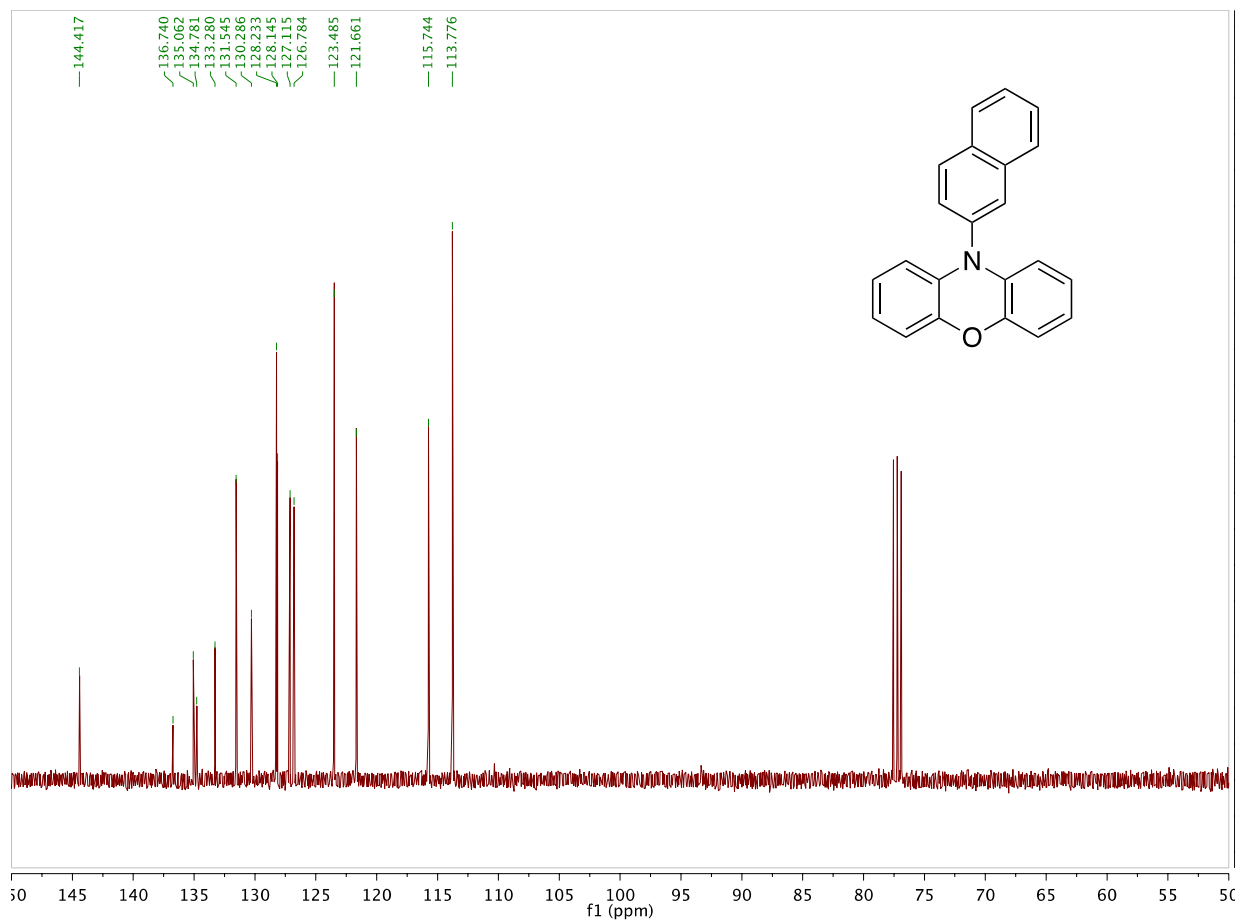

**Figure S7.**  $^{13}\text{C}$  NMR of 2-Naphthalene-10-phenoxazine in  $\text{CDCl}_3$ .

### **1-Naphthalene-10-phenothiazine**

A stir bar was placed in a 50 mL storage flask, flame dried under vacuum and then back filled with nitrogen three times. The flask was then charged with phenothiazine (0.600 g, 3.01 mmol, 1.00 eq.), NaO<sup>t</sup>Bu (0.578 g, 6.02 mmol, 2.00 eq.), and RuPhos (42.2 mg, 0.09 mmol, 0.03 eq.). The flask was taken into a nitrogen filled glovebox where RuPhos Precat (73.8 mg, 0.09 mmol, 0.03 eq.), 3 mL dry Dioxane and 1-bromonaphthalene (0.84 mg, 6.02 mmol, 2.00 eq.) were added. The flask was placed in an oil bath at 130° C while stirring for 48 hours. The flask was then cooled to room temperature, diluted with CH<sub>2</sub>Cl<sub>2</sub>, and the solution was washed with water three times, brine once, dried over MgSO<sub>4</sub> and purified by recrystallization from CH<sub>2</sub>Cl<sub>2</sub> layered with hexanes on top at -25° C to yield 253 mg of a yellowish solid, 26% yield. Final purification was conducted via sublimation at 100 mTorr at 155° C. NMR matched that reported previously.<sup>2</sup>

### **3,7-Dibromo 1-Naphthalene-10-phenoxazine**

A literature procedure was adapted for this synthesis.<sup>3</sup> 1-Naphthalene-10-phenoxazine (800 mg, 2.58 mmol, 1eq.) was dissolved in 80mL of chloroform. 80mL of glacial acetic acid was then added to the stirring mixture. Aluminum foil was thoroughly wrapped around to cover the reaction vial, blocking out light. In the dark, powdered N-Bromosuccinimide (944 mg, 5.30 mmol, 2.05 eq.) was added in small portions over a 20 minute period. After 2 hours at room temperature the reaction mixture was concentrated under vacuum. The resulting solid was washed three times with water, brine, then dried with MgSO<sub>4</sub>. A light tan powder (1.0 g, 2.14 mmol, 82.8% yield) was collected. This was used for the Suzuki coupling without further purification. <sup>1</sup>H NMR (C<sub>6</sub>D<sub>6</sub>, 500 MHz) δ 7.82 (d, *J* = 8.48 Hz, 1H), 7.57 (dd, *J* = 25.02, 8.3 Hz, 2H), 7.19 (m, 1H), 7.12 (t, *J* = 8.03 Hz, 2H), 6.88 (dd, *J* = 7.32, 0.57 Hz, 3H), 6.84 (d, *J* = 2.19 Hz, 2H), 6.36 (dd, *J* = 8.54, 2.21 Hz, 2H). <sup>13</sup>C NMR (CDCl<sub>3</sub>, 400MHz) δ 144.27, 135.82, 134.22, 133.32, 130.91, 129.88, 129.15, 128.87, 127.83, 127.29, 127.06, 126.62, 123.02, 118.86, 114.74, 113.06.

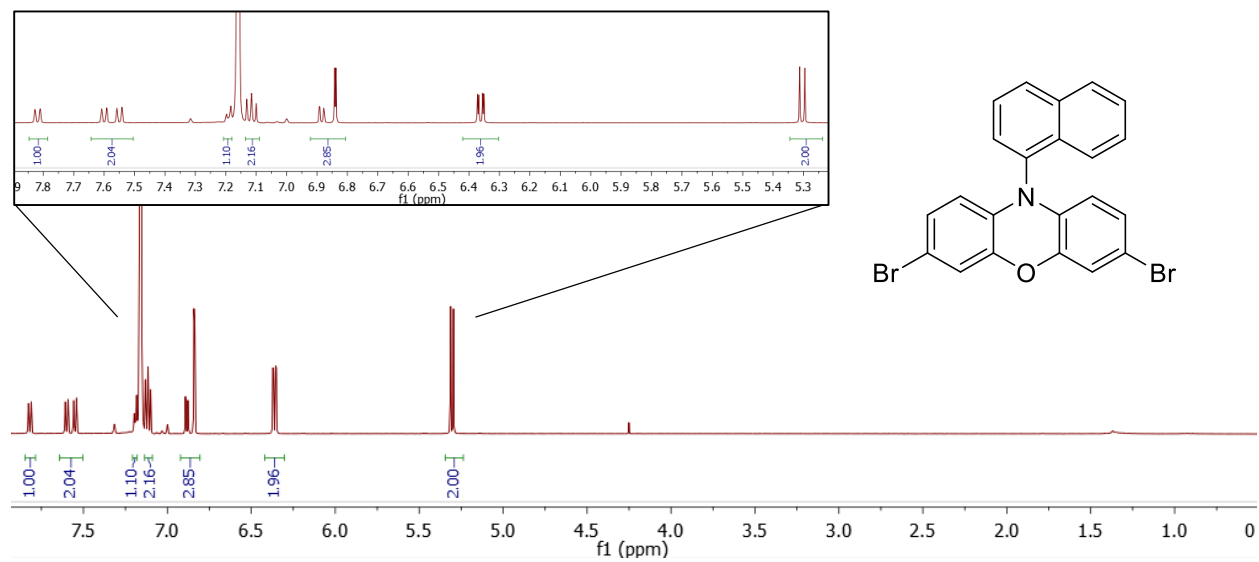

**Figure S8.**  $^1\text{H}$  NMR of 3,7- Dibromo 1-Naphthalene-10-phenoxazine in  $\text{C}_6\text{D}_6$ .



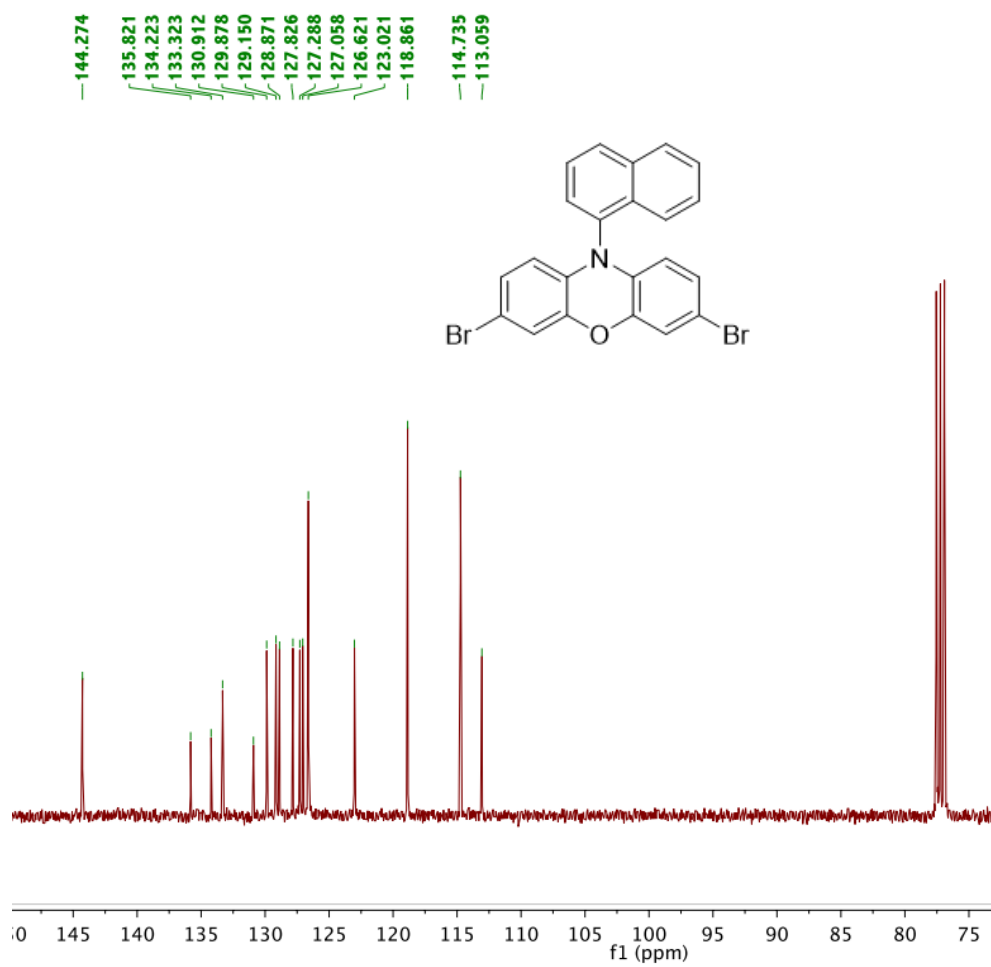

**Figure S9.** <sup>13</sup>C NMR of 3,7- Dibromo 1-Naphthalene-10-phenoxazine in CDCl<sub>3</sub>.

### **3,7-Di(4-biphenyl) 1-Naphthalene-10-Phenoxazine (5)**

A 200mL schlenk flask was flame dried, filled with nitrogen, and equipped with a stir bar and reflux condenser before 3,7-Dibromo 1-Naphthalene-10-phenoxazine (225 mg, 0.48 mmol, 1 eq.), 4-biphenylboronic acid (381.8 mg, 1.9 mmol, 4 eq.) was added, then dissolved in 20 mL of THF. 6 mL of K<sub>2</sub>CO<sub>3</sub> (2M) was syringed into the solution and then heated to 80°C and stirred for 20 minutes. After which, Palladium tetrakis(triphenylphosphine) (93 mg, 15% mol) in a 20mL solution of THF was added then heated to 100°C and left to run for 24 hours. Once complete, the reaction was concentrated under vacuum, dissolved in DCM, and washed with water two times, brine, then dried with MgSO<sub>4</sub>. A bright yellow powder was collected (270 mg, 0.44 mmol, 91.6% yield) after recrystallization in DCM/Methanol. <sup>1</sup>H NMR (C<sub>6</sub>D<sub>6</sub>, 500 MHz) δ 8.18 (d, *J* = 8.35 Hz, 1H), 7.69 (d, *J* = 8.09 Hz, 2H), 7.66 (dd, *J* = 7.21, 2.22 Hz, 2H), 7.51 (d, *J* = 7.21 Hz, 4H), 7.46 (m, 8H), 7.37 (d, *J* = 2.0 Hz, 2H), 7.25 (m, 8H), 6.73 (dd, *J* = 2.03 Hz, 2H), 5.88 (d, *J* = 8.28 Hz, 2H). <sup>13</sup>C NMR (C<sub>6</sub>D<sub>6</sub>, 300 MHz) δ 144.49, 140.93, 139.74, 139.02, 135.69, 135.17, 134.49, 133.60, 131.47, 129.06, 128.82, 128.72, 127.52, 127.08, 126.95, 126.86, 126.76, 126.56, 123.38, 122.05, 114.23, 113.98.

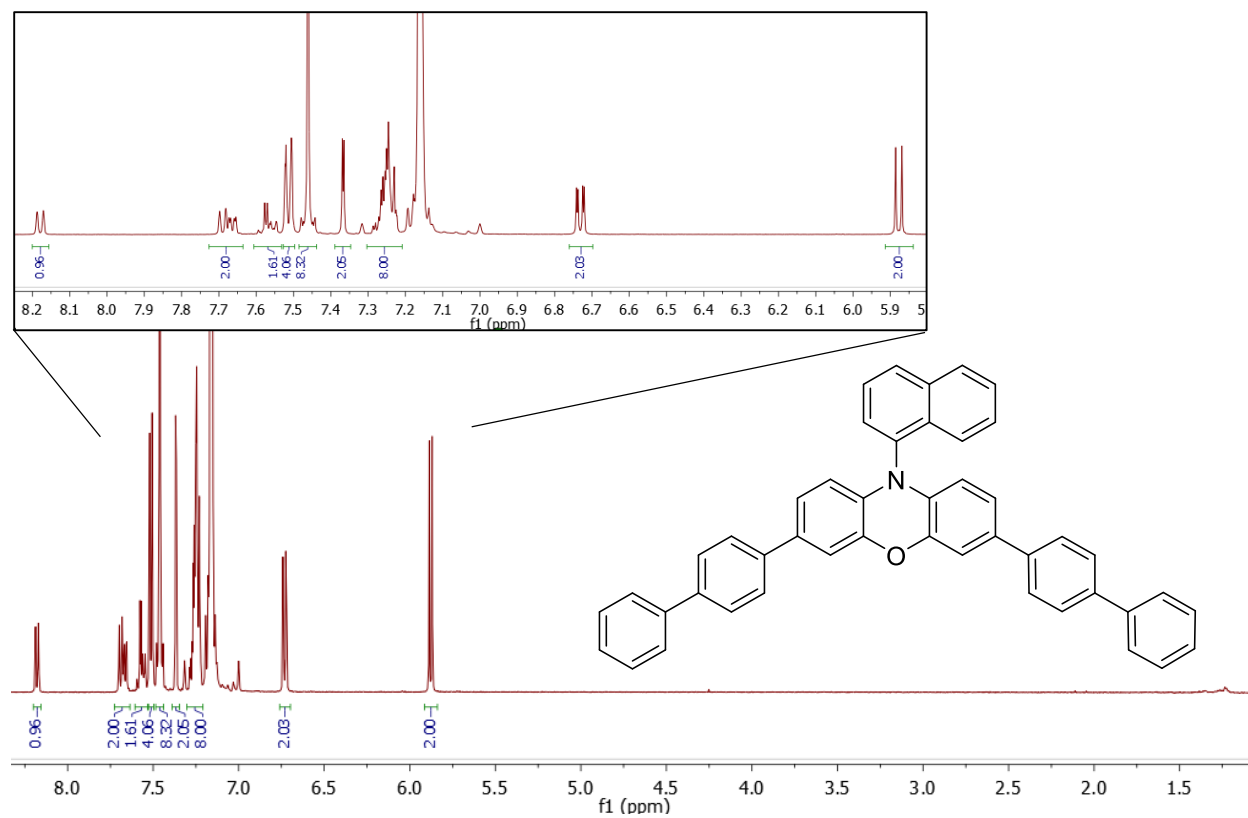

**Figure S10.**  $^1\text{H}$  NMR of 3,7- Dibromo 1-Naphthalene-10-phenoxazine in  $\text{C}_6\text{D}_6$ .

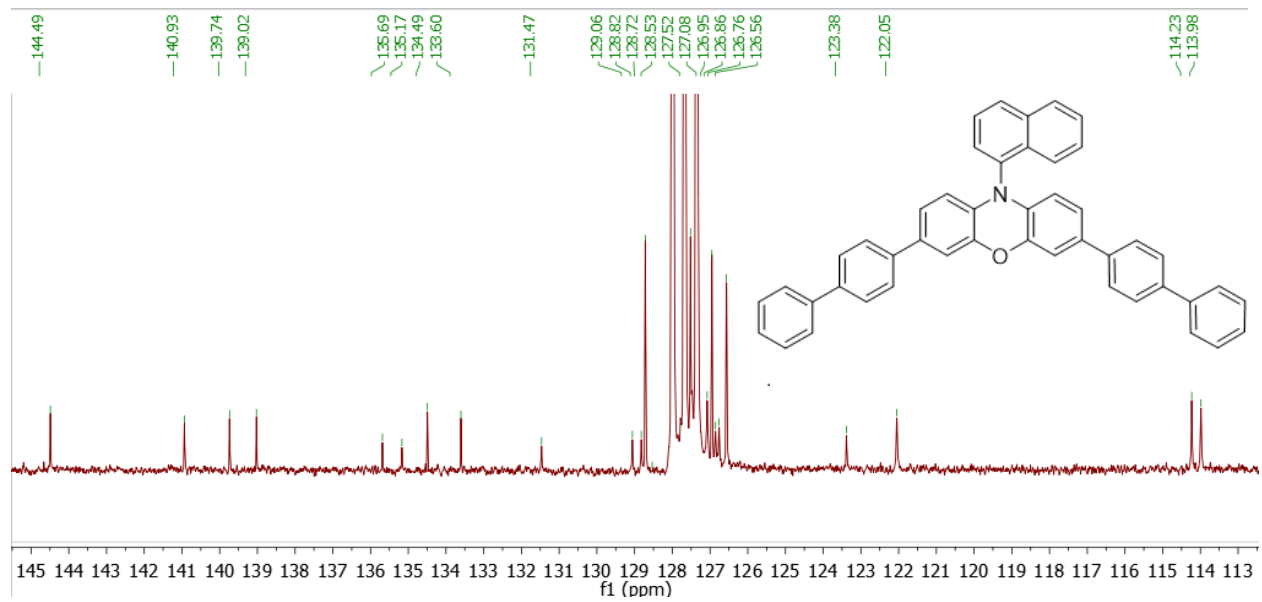

**Figure S11.**  $^{13}\text{C}$  NMR of 3,7- Dibromo 1-Naphthalene-10-phenoxazine in  $\text{C}_6\text{D}_6$ .

## Control experiments

Control polymerizations revealed negligible or no polymerization in the absence of any of the components pertinent to the O-ATRP system (light, PC, or initiator) or in the presence of oxygen.

## General procedure for O-ATRP of MMA using a UV light source

A 20 mL scintillation vial equipped with a small stirbar was transferred into a nitrogen-atmosphere glove box. To this vial DMA, methyl methacrylate (MMA), photocatalyst from a stock solution in DMA and initiator were added in that order via pipette. The vial was tightly sealed and wrapped in aluminum foil. The vial was transferred out of the glove box, the aluminum foil was removed, then placed under UV irradiation while stirring (Figure S12). Timing of the polymerization started once the vial was placed under irradiation. To analyze the progress of the polymerization at a given time point, aluminum foil was wrapped around the vial, the timer was stopped and the sample was taken back into the glove box where a 0.1 mL aliquot of the reaction was removed via syringe and injected into a vial containing 0.7 mL  $\text{CDCl}_3$  with 250 ppm butylated hydroxytoluene (BHT) to quench the reaction. The reaction vessel was then transferred back under UV irradiation where the timer was once again started. This aliquot was then analyzed via NMR for conversion. After NMR, the volatiles were removed from the sample, re-dissolved in THF and passed through a syringe filter for analysis by gel permeation chromatography coupled with multi-angle light scattering.

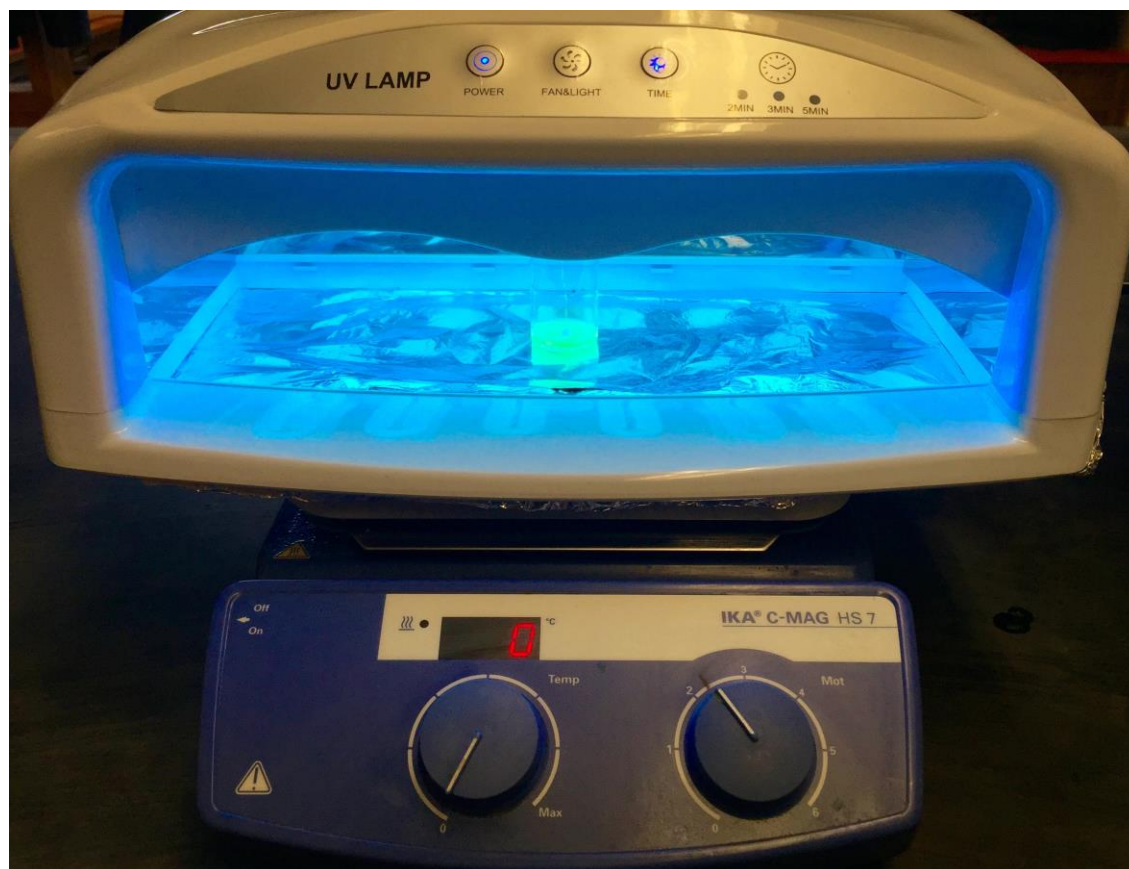

**Figure S12.** Photograph of the reaction setup for O-ATRP using UV irradiation.

## Monomer scope

The polymerization of different monomers - BMA, BnMA and DMA - were carried out using the general polymerization conditions described above. A ratio of [1000]:[10]:[1], [monomer]:[initiator]:[catalyst] was used with 9.35 mmol of monomer used in each trial. An equal volume of DMA to monomer was used. After the polymerization was allowed to run for 8 hours an aliquot was taken for analysis of monomer conversion by  $^1\text{H}$  NMR, after which, methanol was immediately added to the reaction mixture to precipitate out the polymer. The resulting solid polymer was filtered then dried and used for analysis by gel permeation chromatography coupled with multi-angle light scattering. The results from these polymerizations are given in Table S2.

## General procedure for chain extension of poly methyl methacrylate with various monomers by photocatalyzed O-ATRP

### *Synthesis of PMMA Macroinitiator*

Catalyst **3** (23.2 mg, .0748 mmol, 8 eq.) was dissolved in 8.00 mL DMA and stirred with MMA (8.00 mL, 74.8 mmol, 1000 eq.), and DBMM (143  $\mu\text{L}$ , 0.748 mmol, 10 eq.) in a 20 mL scintillation vial in a nitrogen-filled glove box. The reaction mixture was then wrapped in aluminum foil, removed from the glove box and placed into the aforementioned UV apparatus. The reaction ran for 4 hours before the reaction media was poured into 800 mL of stirring room temperature methanol. The resulting polymer was stirred for an hour before being dissolved in a minimal amount of dichloromethane. The polymer was dissolved with dichloromethane and re-precipitated into stirring methanol a total of three times to remove unreacted monomer, initiator or catalyst ( $M_n = 8.83$  kDa,  $M_w = 9.85$  kDa,  $D = 1.12$ ).

### *Synthesis of Block Copolymers from isolated macroinitiator*

Block copolymers were synthesized using a ratio of [1500]:[10]:[1], [monomer]:[initiator]:[catalyst] using 0.100 g of macroinitiator in each trial, and catalyst **3**. Each reaction was set up using the same method as the general polymerization procedure described above. The polymerizations were all run for 10 hours before the reaction media was poured into 100 mL of stirring, room temperature methanol. The resulting polymers were collected via vacuum filtration and dried under vacuum. The results from these polymerizations are given in Table S3.

### General procedure for O-ATRP of MMA using a visible light source

A 20 mL scintillation vial equipped with a small stirbar was transferred into a nitrogen-atmosphere glove box. To this vial DMA, methyl methacrylate (MMA), photocatalyst from a stock solution in DMA and initiator were added in that order via pipette. Timing of the polymerization started once the vial was placed into an LED-lined beaker (Figure S13). To analyze the progress of the polymerization at a given time point, a 0.1 mL aliquot of the reaction was removed via syringe and injected into a vial containing 0.7 mL  $\text{CDCl}_3$  with 250 ppm butylated hydroxytoluene (BHT) to quench the reaction. This aliquot was then analyzed via NMR for conversion. After NMR, the volatiles were removed from the sample, re-dissolved in THF and passed through a syringe filter for analysis by gel permeation chromatography coupled with multi-angle light scattering.

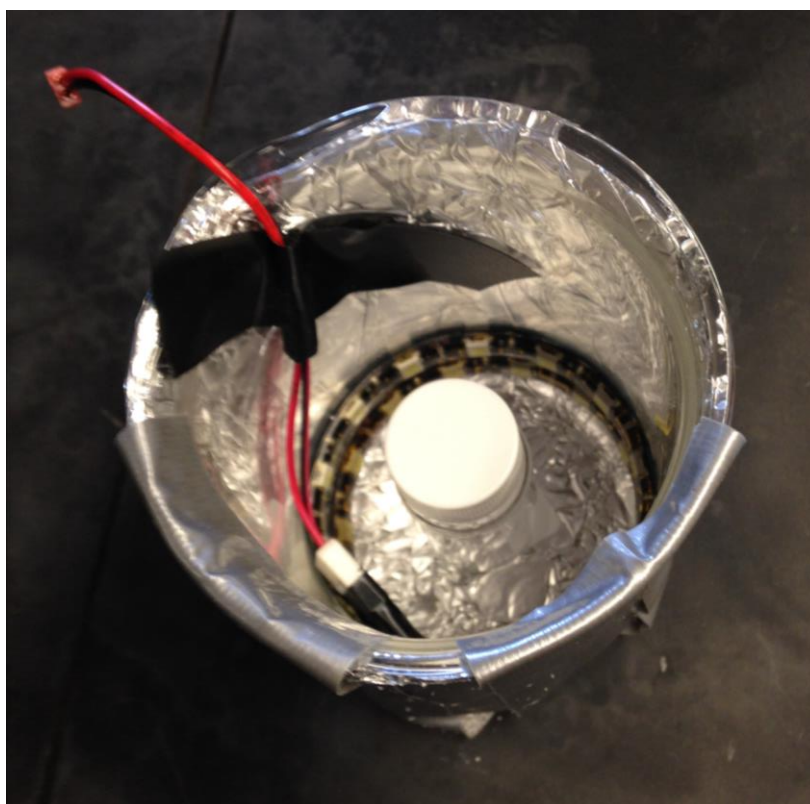

**Figure S13.** Photograph of the reaction setup for O-ATRP using visible light LED beakers.

### 3. Characterization of Catalysts' Photoredox Properties

#### UV-vis absorption spectroscopy

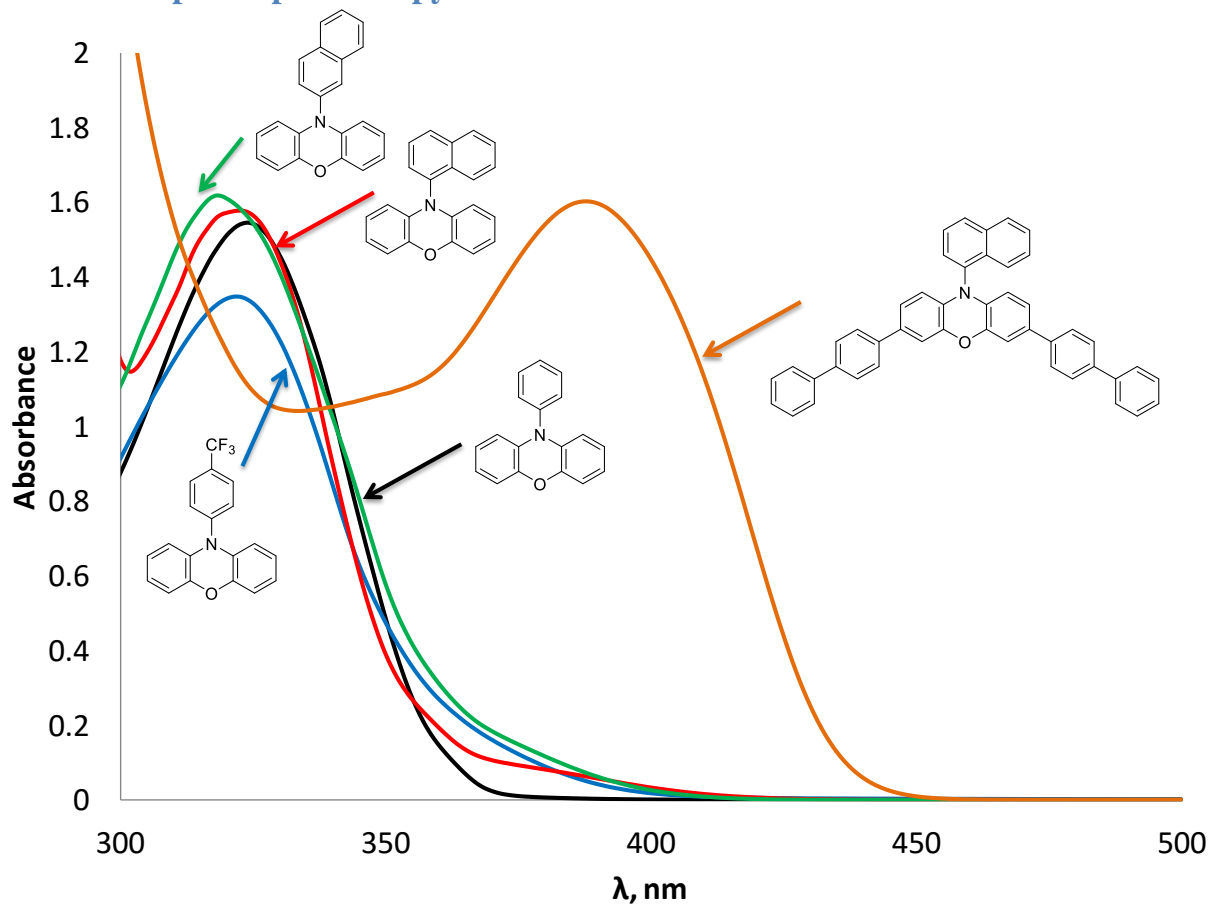

**Figure S14.** UV-vis absorption spectra of the phenoxazine photocatalysts. PC 1-4 were taken at 0.20 mM and PC 5 was taken at 0.06mM. Solvent = DMA. Path length = 1cm.



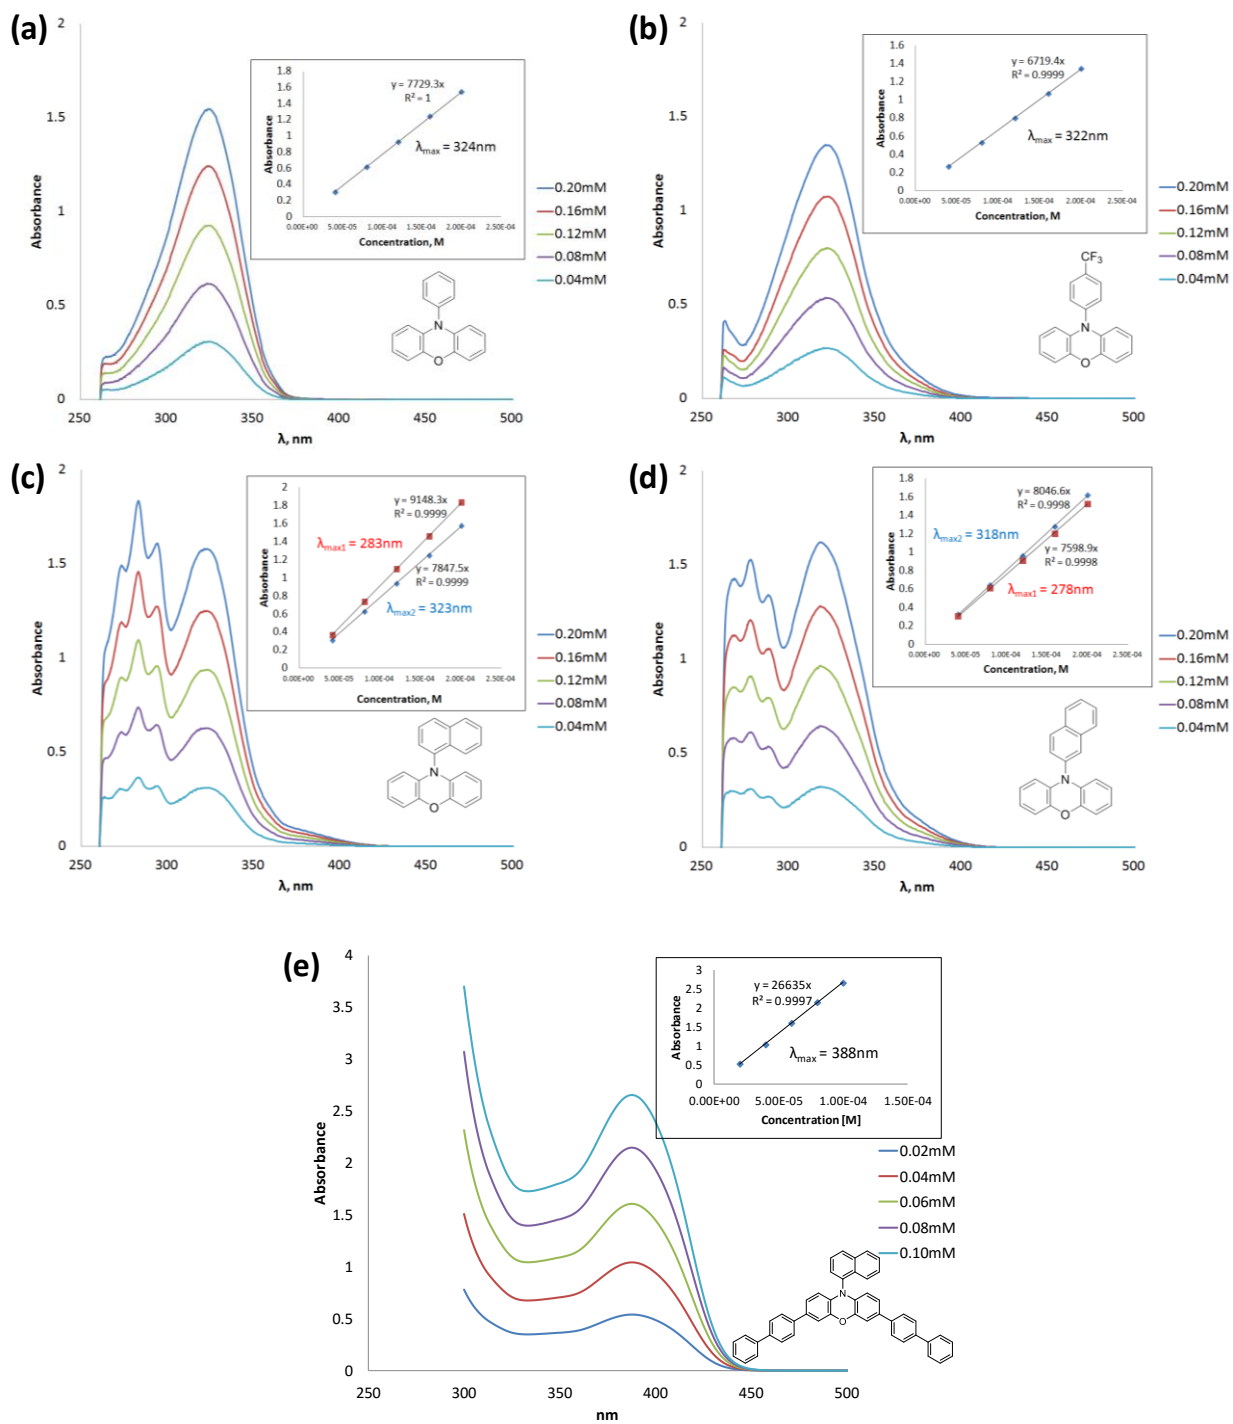

**Figure S15.** UV-vis absorption of the phenoxazine catalysts taken at different concentrations in DMA. Path length = 1cm.

## Fluorescence spectroscopy

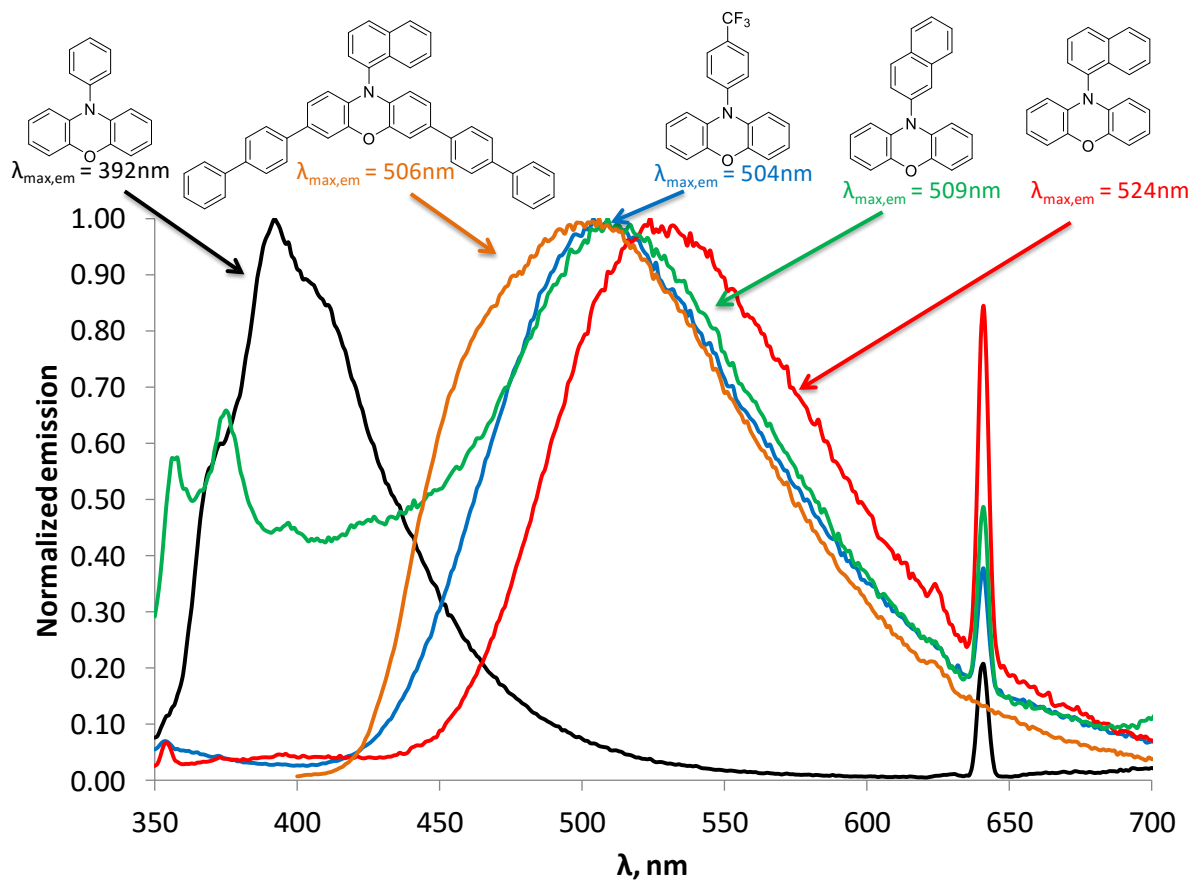

**Figure S16.** Plot of the normalized emission spectrums of the phenoxazine photocatalysts in DMA. PC 1-4 were irradiated with 320 nm light while PC 5 was irradiated with 380nm light.

## Cyclic voltammetry

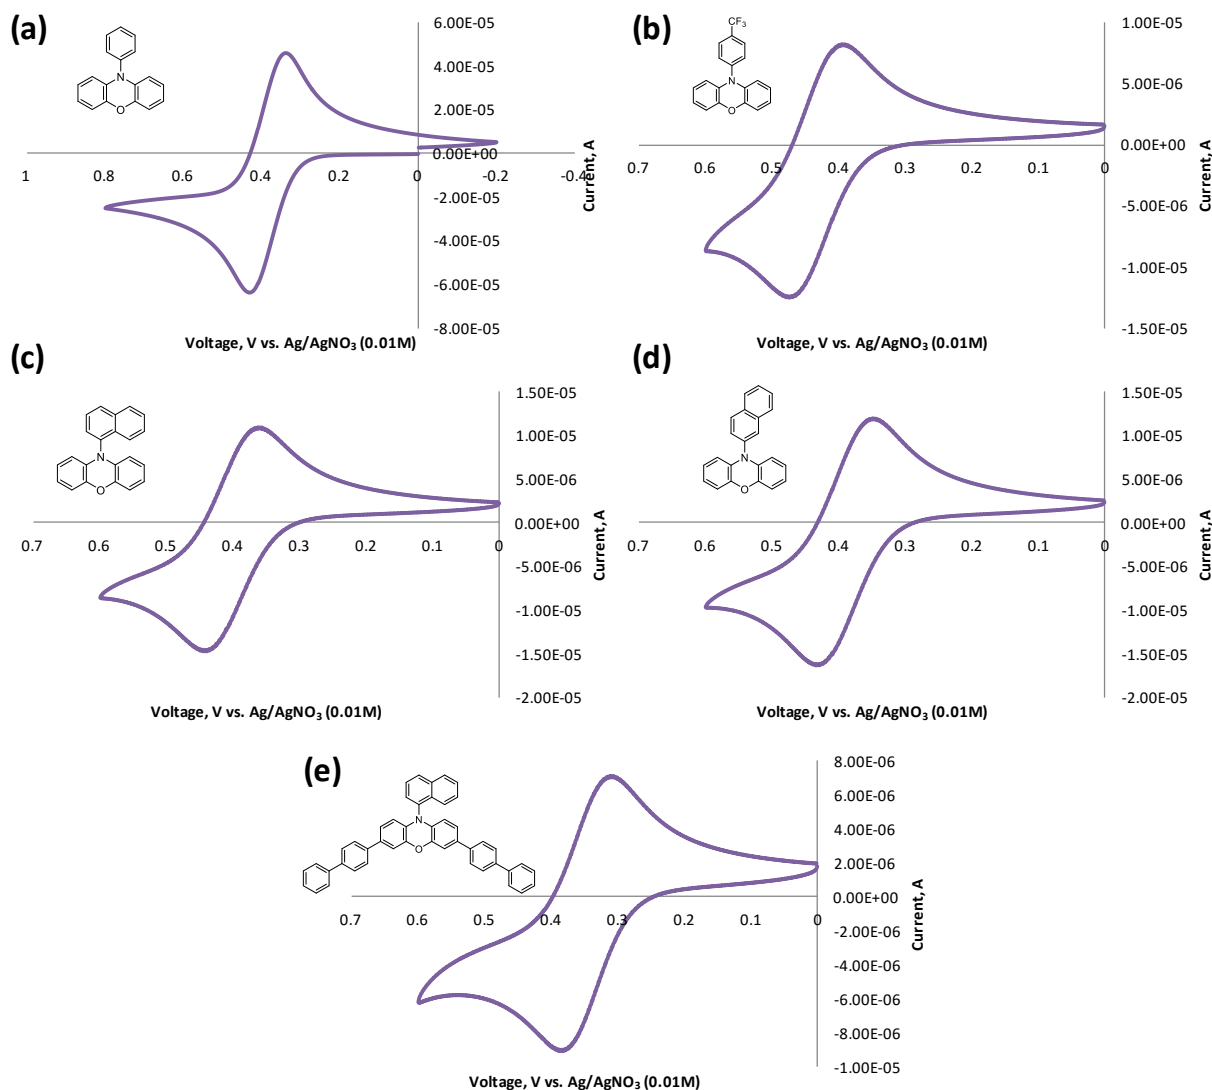

**Figure S17.** Cyclic voltammograms of the phenoxazine photocatalysts performed in a 3-compartment electrochemical cell. Reference electrode: Ag/AgNO<sub>3</sub> (0.01M) in MeCN; electrolyte: 0.1 M NBu<sub>4</sub>PF<sub>6</sub>; scan rate: 0.10 V/s. DMA is used as the solvent in the working electrode compartment for (b)-(e) while MeCN is used as the solvent in (a). Platinum is used as both the working and counter electrodes.

## Experimental and theoretical determination of excited state reduction potentials

**Table S1.** Calculation of excited state reduction potentials of photocatalysts **1-5**.

| PC       | abs $\lambda_{\max}$ (nm) <sup>a</sup> | $\epsilon_{\lambda_{\max}}$ (M <sup>-1</sup> cm <sup>-1</sup> ) <sup>b</sup> | em $\lambda_{\max}$ (nm) <sup>c</sup> | E(em $\lambda_{\max}$ ) (V vs. SCE) <sup>d</sup> | E(triplet), theo (V vs. SCE) <sup>e</sup> |
|----------|----------------------------------------|------------------------------------------------------------------------------|---------------------------------------|--------------------------------------------------|-------------------------------------------|
| <b>1</b> | 324                                    | 7729                                                                         | 392                                   | 3.16                                             | 2.69                                      |
| <b>2</b> | 322                                    | 6719                                                                         | 504                                   | 2.46                                             | 2.63                                      |
| <b>3</b> | 323                                    | 7848                                                                         | 524                                   | 2.37                                             | 2.39                                      |
| <b>4</b> | 318                                    | 8047                                                                         | 509                                   | 2.44                                             | 2.45                                      |
| <b>5</b> | 388                                    | 26635                                                                        | 506                                   | 2.45                                             | 2.41                                      |

| PC       | E <sub>1/2</sub> (PC <sup>•+</sup> /PC) (V vs. SCE) <sup>f</sup> | E <sup>0</sup> (PC <sup>•+</sup> /PC), theo (V vs. SCE) <sup>e</sup> | E <sup>0*</sup> (PC <sup>•+</sup> /PC*) (V vs. SCE) | E <sup>0*</sup> (PC <sup>•+</sup> / <sup>3</sup> PC*), theo (V vs. SCE) <sup>e</sup> |
|----------|------------------------------------------------------------------|----------------------------------------------------------------------|-----------------------------------------------------|--------------------------------------------------------------------------------------|
| <b>1</b> | 0.68                                                             | 0.58                                                                 | -2.48 <sup>g</sup>                                  | -2.11                                                                                |
| <b>2</b> | 0.73                                                             | 0.59                                                                 | -1.73                                               | -2.03                                                                                |
| <b>3</b> | 0.70                                                             | 0.55                                                                 | -1.67                                               | -1.84                                                                                |
| <b>4</b> | 0.69                                                             | 0.55                                                                 | -1.75                                               | -1.90                                                                                |
| <b>5</b> | 0.65                                                             | 0.48                                                                 | -1.80                                               | -1.93                                                                                |

<sup>a</sup>Maximum absorption wavelength; PC 3 and 4 exhibit another  $\lambda_{\max}$  at higher energy wavelengths of 283 nm and 278 nm, respectively. <sup>b</sup>Molar absorptivity at the reported  $\lambda_{\max}$ . <sup>c</sup>Maximum emission wavelength when irradiated with 320 nm light (PC **1-4**) and 380 nm light (PC **5**). <sup>d</sup>Energy of emitted photons. <sup>e</sup>Theoretical predictions from DFT calculations at uM06/6-311+Gdp/CPCM-H<sub>2</sub>O//uM06/6-31+Gdp/CPCM-H<sub>2</sub>O level of theory. <sup>f</sup>Obtained from cyclic voltammetry. <sup>g</sup>The E<sup>0\*</sup> of PC **1** is significantly more negative than PC **2-5** and deviates from the predicted trend. In the DFT calculations, the triplet excited state was explicitly assumed while the observed emission is likely fluorescence from the relaxed singlet excited state.

#### 4. Computational Details

Standard reduction potentials ( $E^0$ ) were calculated following previously reported procedures.<sup>4,5,6,7</sup> A value of -100.5 kcal/mol was assumed for the reduction free energy of the standard hydrogen electrode (SHE) as described in Ref. 4. Thus,  $E^0 = (-100.5 - \Delta G_{\text{red}})/23.06$  (V vs. SHE); for  $E^0(\text{PC}^{*+}/{}^3\text{PC}^*)$ ,  $\Delta G_{\text{red}} = G({}^3\text{PC}^*) - G(\text{PC}^{*+})$  while for  $E^0(\text{PC}^{*+}/\text{PC})$ ,  $\Delta G_{\text{red}} = G(\text{PC}) - G(\text{PC}^{*+})$ . The Gibbs free energies of  ${}^3\text{PC}^*$ ,  $\text{PC}^{*+}$ , and PC (for PC 1-4) were calculated at the unrestricted M06/6-311+G\*\* level of theory in CPCM-H<sub>2</sub>O solvent (single point energy) using geometries optimized at unrestricted M06/6-31+G\*\* level of theory in CPCM-H<sub>2</sub>O solvent. The triple zeta basis set (6-311+G\*\*) generally improves the  $E^0(\text{PC}^{*+}/\text{PC})$  by ~0.1V relative to 6-31+G\*\*, while the triplet energy is invariant for these two basis sets. To reference to the Saturated Calomel Electrode (SCE),  $E^0$  (vs. SHE) is converted to  $E^0$  (vs. SCE) using  $E^0$  (vs. SCE) =  $E^0$  (vs. SHE) - 0.24 V. Triplet energies (in eV) of PCs were obtained by  $[G({}^3\text{PC}^*) - G(\text{PC})]$ , in kcal/mol]/23.06. Population analysis was performed using electrostatic potential-derived charges with the CHELPG method<sup>8</sup> performed at the unrestricted M06/6-31G\*\* level of theory in CPCM-H<sub>2</sub>O solvent.

Geometry optimization of PC **5** (3,7-Di(4-biphenyl) 1-Naphthalene- 10-Phenoxazine) was performed at the unrestricted M06/Lanl2dz level of theory in CPCM-H<sub>2</sub>O solvent; the smaller Lanl2dz basis sets was employed for computational efficiency due to its extensive structure. Singlet point calculation at the converged M06/Lanl2dz geometry was then performed at the unrestricted M06/6-311+G\*\* level of theory in CPCM-H<sub>2</sub>O solvent.

## 5. Supplemental Polymerization Data

**Table S2.** Polymerization Results of O-ATRP of Methacrylates.<sup>a</sup>

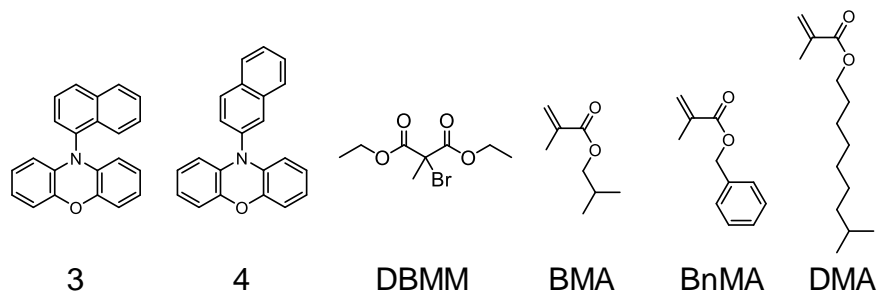

| PC | Monomer | Time (h) | Conv (%) | $M_n$ (kDa) | $M_w$ (kDa) | $\bar{D}$ ( $M_w/M_n$ ) | $I^*$ (%) |
|----|---------|----------|----------|-------------|-------------|-------------------------|-----------|
| 3  | BMA     | 8        | 62.0     | 13.5        | 16.4        | 1.22                    | 67.4      |
| 3  | BnMA    | 8        | 46.1     | 8.2         | 11.6        | 1.41                    | 102       |
| 3  | DMA     | 8        | 87.5     | 20.9        | 28.3        | 1.35                    | 42.9      |
| 4  | BMA     | 8        | 62       | 15.2        | 17.3        | 1.14                    | 59.7      |
| 4  | BnMA    | 8        | 77.1     | 12.5        | 16.0        | 1.28                    | 110       |
| 4  | IDMA    | 8        | 83.2     | 21.7        | 28.4        | 1.31                    | 39.6      |

<sup>a</sup>Polymerizations of vinyl monomers were performed at [1000]:[10]:[1] using DBMM as the initiator and the same volume of solvent as that of the monomer added.

**Table S3.** Polymerization Results of O-ATRP PMMA chain extensions.<sup>a</sup>

| PC | Monomer A | Monomer B | Time (h) | $M_n$ (kDa) | $M_w$ (kDa) | $\bar{D}$ ( $M_w/M_n$ ) |
|----|-----------|-----------|----------|-------------|-------------|-------------------------|
| 3  | MMA       | MMA       | 10       | 38.8        | 49.4        | 1.27                    |
| 3  | MMA       | BMA       | 10       | 38.8        | 43.8        | 1.13                    |
| 3  | MMA       | IDMA      | 10       | 59.8        | 77.6        | 1.29                    |
| 3  | MMA       | BnMA      | 10       | 46.8        | 67.1        | 1.43                    |

<sup>a</sup>Polymerization chain extensions were performed at [1500]:[10]:[1] using a PMMA macroinitiator and the same volume of solvent as that of the monomer added.

**Table S4.** Polymerization Results of O-ATRP initiator screen for PC **1-4**.<sup>a</sup>

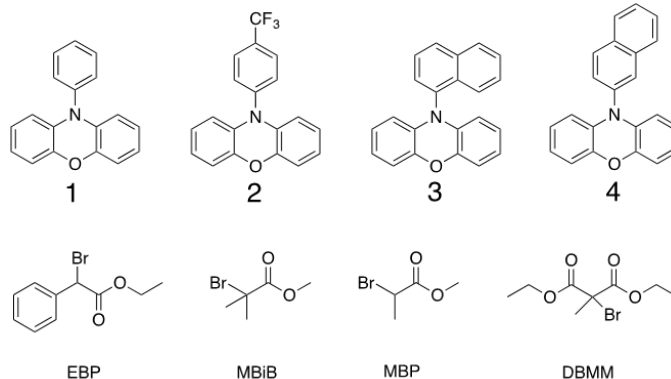

| PC | Initiator | Time (h) | Conv (%) | $M_n$ (kDa) | $M_w$ (kDa) | $D$<br>( $M_w/M_n$ ) | $I^*$<br>(%) |
|----|-----------|----------|----------|-------------|-------------|----------------------|--------------|
| 1  | EBP       | 8        | 92.2     | 8.01        | 14.3        | 1.79                 | 119          |
| 1  | DBMM      | 8        | 95.6     | 7.16        | 10.6        | 1.48                 | 137          |
| 2  | EBP       | 8        | 61.2     | 15.4        | 20.7        | 1.34                 | 41.2         |
| 2  | DBMM      | 8        | 55.3     | 6.54        | 9.48        | 1.45                 | 85.5         |
| 3  | EBP       | 8        | 66.4     | 9.29        | 12.6        | 1.36                 | 74.2         |
| 3  | MBiB      | 8        | 76.5     | 9.58        | 11.8        | 1.23                 | 81.8         |
| 3  | MBP       | 8        | 70.7     | 10.9        | 14.1        | 1.29                 | 66.4         |
| 3  | DBMM      | 8        | 78.8     | 8.79        | 10.8        | 1.22                 | 92.6         |
| 4  | EBP       | 8        | 59.0     | 11.3        | 13.6        | 1.21                 | 54.7         |
| 4  | MBiB      | 8        | 69.2     | 11.3        | 15.0        | 1.34                 | 63.3         |
| 4  | MBP       | 8        | 31.7     | 5.80        | 6.87        | 1.19                 | 57.6         |
| 4  | DBMM      | 8        | 80.2     | 10.7        | 11.9        | 1.11                 | 77.3         |

<sup>a</sup>Polymerizations were performed at [1000]:[10]:[1] for [MMA]:[Initiator]:[PC] using the same volume of DMA as that of the monomer added.

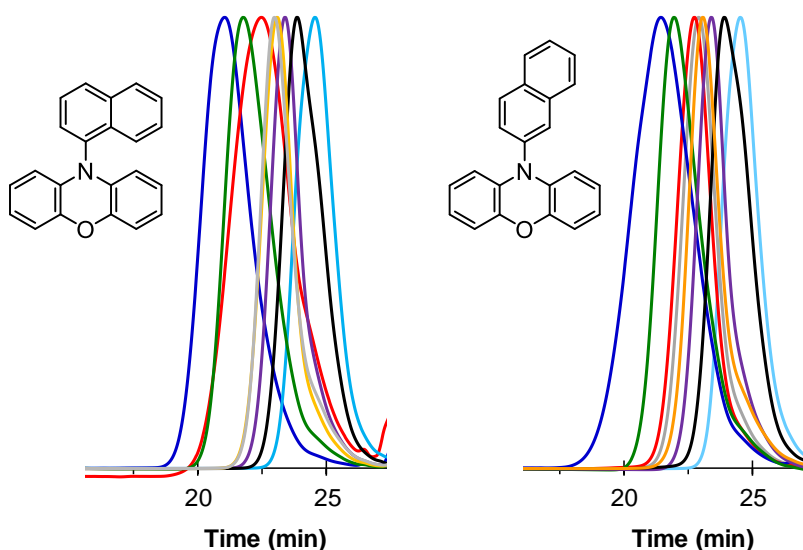

**Figure S18.** Gel permeation traces of PMMA produced using **3** (left) and **4** (right) reported in Table 2 of the Main Text. Color scheme corresponds to: (left plot) run 5 (light blue), run 6 (gray), run 7 (orange), run 8 (red), run 9 (green), run 10 (blue), run 11 (purple), run 12 (black); (right plot) run 13 (light blue), run 14 (orange), run 15 (gray), run 16 (red), run 17 (green), run 18 (blue), run 19 (purple), run 20 (black).

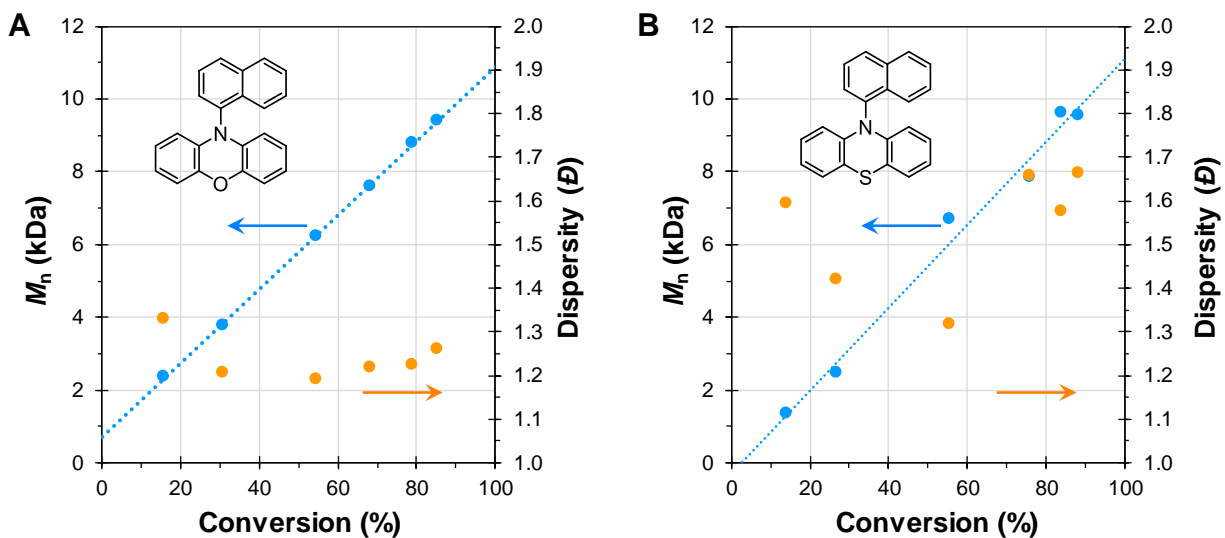

**Figure S19.** Plots of number average molecular weight (blue) and dispersity (orange) as a function of monomer conversion in the polymerization of methyl methacrylate catalyzed by 1-naphthylene-10-phenoxazine (A) and 1-naphthylene-10-phenothiazine (B). Conditions: [MMA]:[DBMM]:[PC] = [1000]:[10]:[1]; 9.35  $\mu$ moles PC, 1.00 mL dimethylacetamide, and irradiated with 365 nm light.



## 6. X-ray Crystallography Data

Structures were determined for the compounds listed in Table 1. Single crystals were coated with Paratone-N oil and mounted under a cold stream of dinitrogen gas. Single crystal X-ray diffraction data were acquired on a Bruker Kappa APEX II CCD diffractometer with Mo K $\alpha$  radiation ( $\lambda = 0.71073 \text{ \AA}$ ) and a graphite monochromator. Initial lattice parameters were obtained from a least-squares analysis of more than 100 reflections; these parameters were later refined against all data. None of the crystals showed significant decay during data collection. Data were integrated and corrected for Lorentz and polarization effects using Bruker APEX3 software, and semiempirical absorption corrections were applied using SCALE (Sheldrick, G. M. SADABS – a program for area detector absorption corrections). Space group assignments were based on systematic absences, E statistics, and successful refinement of the structures. Structures were solved using Direct Methods and were refined with the aid of successive Fourier difference maps against all data using the SHELXTL 6.14 software package (Sheldrick, G. M. SHELXTL, v. 6.12; Bruker AXS: Madison, WI, 1999). Thermal parameters for all non-hydrogen atoms were refined anisotropically. All hydrogen atoms were assigned to ideal positions and refined using a riding model with an isotropic thermal parameter 1.2 times that of the attached carbon atom (1.5 times for methyl hydrogens).

In the structure of 'gm01', there is a disordered solvate molecule that was found in Fourier difference maps. After numerous attempts to model the disorder failed, SQUEEZE (Spek, A. L. J. Appl. Crystallogr. 2003, 36, 7) was used to remove the remaining disordered components. According to the SQUEEZE output, approximately 4 dichloromethane solvent molecules are present in the void space and were removed. The chemical data presented for 'gm01' in Table 1-5 do not include the components removed by SQUEEZE.

## 1-Naphthalene-10-phenoxazine

Table 1. Crystal data and structure refinement for gm01.

|                                   |                                             |                 |
|-----------------------------------|---------------------------------------------|-----------------|
| Identification code               | gm01                                        |                 |
| Empirical formula                 | C <sub>22</sub> H <sub>15</sub> N O         |                 |
| Formula weight                    | 309.35                                      |                 |
| Temperature                       | 117(2) K                                    |                 |
| Wavelength                        | 0.71073 Å                                   |                 |
| Crystal system                    | Triclinic                                   |                 |
| Space group                       | P-1                                         |                 |
| Unit cell dimensions              | a = 8.8713(6) Å                             | a = 83.142(4)°. |
|                                   | b = 9.1631(6) Å                             | b = 78.687(4)°. |
|                                   | c = 11.2812(9) Å                            | g = 71.594(4)°. |
| Volume                            | 851.59(11) Å <sup>3</sup>                   |                 |
| Z                                 | 2                                           |                 |
| Density (calculated)              | 1.206 Mg/m <sup>3</sup>                     |                 |
| Absorption coefficient            | 0.074 mm <sup>-1</sup>                      |                 |
| F(000)                            | 324                                         |                 |
| Crystal size                      | 0.374 x 0.132 x 0.097 mm <sup>3</sup>       |                 |
| Theta range for data collection   | 1.844 to 27.480°.                           |                 |
| Index ranges                      | -11 ≤ h ≤ 11, -11 ≤ k ≤ 11, -14 ≤ l ≤ 12    |                 |
| Reflections collected             | 13754                                       |                 |
| Independent reflections           | 3908 [R(int) = 0.0632]                      |                 |
| Completeness to theta = 25.242°   | 99.9 %                                      |                 |
| Absorption correction             | Semi-empirical from equivalents             |                 |
| Max. and min. transmission        | 0.7466 and 0.6543                           |                 |
| Refinement method                 | Full-matrix least-squares on F <sup>2</sup> |                 |
| Data / restraints / parameters    | 3908 / 0 / 217                              |                 |
| Goodness-of-fit on F <sup>2</sup> | 1.030                                       |                 |
| Final R indices [I > 2σ(I)]       | R1 = 0.0569, wR2 = 0.1236                   |                 |
| R indices (all data)              | R1 = 0.0976, wR2 = 0.1452                   |                 |
| Extinction coefficient            | n/a                                         |                 |
| Largest diff. peak and hole       | 0.714 and -0.316 e.Å <sup>-3</sup>          |                 |

Table 2. Atomic coordinates ( $\times 10^4$ ) and equivalent isotropic displacement parameters ( $\text{\AA}^2 \times 10^3$ ) for gm01.  $U(\text{eq})$  is defined as one third of the trace of the orthogonalized  $U^{ij}$  tensor.

|       | x        | y        | z       | $U(\text{eq})$ |
|-------|----------|----------|---------|----------------|
| N(1)  | 6593(2)  | 5936(2)  | 2786(2) | 20(1)          |
| O(1)  | 4626(2)  | 8354(2)  | 1482(2) | 32(1)          |
| C(1)  | 7016(3)  | 7296(2)  | 2431(2) | 18(1)          |
| C(2)  | 8383(3)  | 7524(3)  | 2705(2) | 22(1)          |
| C(3)  | 8730(3)  | 8902(3)  | 2356(2) | 27(1)          |
| C(4)  | 7728(3)  | 10074(3) | 1732(2) | 27(1)          |
| C(5)  | 6359(3)  | 9864(2)  | 1445(2) | 24(1)          |
| C(6)  | 6018(3)  | 8490(2)  | 1783(2) | 21(1)          |
| C(7)  | 4389(3)  | 6910(2)  | 1653(2) | 21(1)          |
| C(8)  | 3127(3)  | 6743(3)  | 1192(2) | 26(1)          |
| C(9)  | 2788(3)  | 5348(3)  | 1372(2) | 28(1)          |
| C(10) | 3740(3)  | 4122(3)  | 1995(2) | 25(1)          |
| C(11) | 5026(3)  | 4285(2)  | 2450(2) | 21(1)          |
| C(12) | 5354(3)  | 5691(2)  | 2301(2) | 18(1)          |
| C(13) | 7645(3)  | 4684(2)  | 3414(2) | 18(1)          |
| C(14) | 7385(3)  | 4571(2)  | 4651(2) | 22(1)          |
| C(15) | 8427(3)  | 3356(3)  | 5281(2) | 26(1)          |
| C(16) | 9680(3)  | 2286(3)  | 4653(2) | 24(1)          |
| C(17) | 9978(3)  | 2366(2)  | 3362(2) | 19(1)          |
| C(18) | 11261(3) | 1279(2)  | 2679(2) | 22(1)          |
| C(19) | 11520(3) | 1396(2)  | 1442(2) | 23(1)          |
| C(20) | 10497(3) | 2618(2)  | 816(2)  | 22(1)          |
| C(21) | 9246(3)  | 3692(2)  | 1437(2) | 19(1)          |
| C(22) | 8944(3)  | 3600(2)  | 2728(2) | 17(1)          |

Table 3. Bond lengths [ $\text{\AA}$ ] and angles [ $^\circ$ ] for gm01.

---

|                  |            |
|------------------|------------|
| N(1)-C(1)        | 1.404(3)   |
| N(1)-C(12)       | 1.407(3)   |
| N(1)-C(13)       | 1.442(3)   |
| O(1)-C(6)        | 1.389(3)   |
| O(1)-C(7)        | 1.390(3)   |
| C(1)-C(2)        | 1.390(3)   |
| C(1)-C(6)        | 1.403(3)   |
| C(2)-C(3)        | 1.387(3)   |
| C(3)-C(4)        | 1.379(3)   |
| C(4)-C(5)        | 1.390(3)   |
| C(5)-C(6)        | 1.379(3)   |
| C(7)-C(8)        | 1.379(3)   |
| C(7)-C(12)       | 1.400(3)   |
| C(8)-C(9)        | 1.386(3)   |
| C(9)-C(10)       | 1.383(3)   |
| C(10)-C(11)      | 1.394(3)   |
| C(11)-C(12)      | 1.392(3)   |
| C(13)-C(14)      | 1.365(3)   |
| C(13)-C(22)      | 1.422(3)   |
| C(14)-C(15)      | 1.421(3)   |
| C(15)-C(16)      | 1.366(3)   |
| C(16)-C(17)      | 1.425(3)   |
| C(17)-C(18)      | 1.416(3)   |
| C(17)-C(22)      | 1.429(3)   |
| C(18)-C(19)      | 1.366(3)   |
| C(19)-C(20)      | 1.413(3)   |
| C(20)-C(21)      | 1.365(3)   |
| C(21)-C(22)      | 1.425(3)   |
|                  |            |
| C(1)-N(1)-C(12)  | 118.99(17) |
| C(1)-N(1)-C(13)  | 119.37(17) |
| C(12)-N(1)-C(13) | 120.20(16) |
| C(6)-O(1)-C(7)   | 117.86(16) |
| C(2)-C(1)-C(6)   | 118.03(19) |

|                   |            |
|-------------------|------------|
| C(2)-C(1)-N(1)    | 122.80(19) |
| C(6)-C(1)-N(1)    | 119.17(19) |
| C(3)-C(2)-C(1)    | 120.6(2)   |
| C(4)-C(3)-C(2)    | 120.8(2)   |
| C(3)-C(4)-C(5)    | 119.4(2)   |
| C(6)-C(5)-C(4)    | 119.9(2)   |
| C(5)-C(6)-O(1)    | 117.30(19) |
| C(5)-C(6)-C(1)    | 121.2(2)   |
| O(1)-C(6)-C(1)    | 121.44(19) |
| C(8)-C(7)-O(1)    | 117.07(19) |
| C(8)-C(7)-C(12)   | 121.4(2)   |
| O(1)-C(7)-C(12)   | 121.50(19) |
| C(7)-C(8)-C(9)    | 119.9(2)   |
| C(10)-C(9)-C(8)   | 119.6(2)   |
| C(9)-C(10)-C(11)  | 120.4(2)   |
| C(12)-C(11)-C(10) | 120.5(2)   |
| C(11)-C(12)-C(7)  | 118.12(19) |
| C(11)-C(12)-N(1)  | 122.76(18) |
| C(7)-C(12)-N(1)   | 119.12(18) |
| C(14)-C(13)-C(22) | 121.46(19) |
| C(14)-C(13)-N(1)  | 119.5(2)   |
| C(22)-C(13)-N(1)  | 119.06(19) |
| C(13)-C(14)-C(15) | 120.0(2)   |
| C(16)-C(15)-C(14) | 120.2(2)   |
| C(15)-C(16)-C(17) | 121.2(2)   |
| C(18)-C(17)-C(16) | 122.86(19) |
| C(18)-C(17)-C(22) | 118.5(2)   |
| C(16)-C(17)-C(22) | 118.7(2)   |
| C(19)-C(18)-C(17) | 121.4(2)   |
| C(18)-C(19)-C(20) | 120.1(2)   |
| C(21)-C(20)-C(19) | 120.5(2)   |
| C(20)-C(21)-C(22) | 120.7(2)   |
| C(13)-C(22)-C(21) | 122.67(19) |
| C(13)-C(22)-C(17) | 118.47(19) |
| C(21)-C(22)-C(17) | 118.9(2)   |

Table 4. Anisotropic displacement parameters ( $\text{\AA}^2 \times 10^3$ ) for gm01. The anisotropic displacement factor exponent takes the form:  $-2p^2[ h^2 a^*2U^{11} + \dots + 2 h k a^* b^* U^{12} ]$

|       | U <sup>11</sup> | U <sup>22</sup> | U <sup>33</sup> | U <sup>23</sup> | U <sup>13</sup> | U <sup>12</sup> |
|-------|-----------------|-----------------|-----------------|-----------------|-----------------|-----------------|
| N(1)  | 17(1)           | 17(1)           | 24(1)           | 2(1)            | -8(1)           | -3(1)           |
| O(1)  | 22(1)           | 21(1)           | 53(1)           | 11(1)           | -17(1)          | -4(1)           |
| C(1)  | 19(1)           | 19(1)           | 14(1)           | -3(1)           | 1(1)            | -4(1)           |
| C(2)  | 24(1)           | 27(1)           | 17(1)           | -1(1)           | -6(1)           | -8(1)           |
| C(3)  | 30(2)           | 33(1)           | 23(1)           | -2(1)           | -5(1)           | -16(1)          |
| C(4)  | 35(2)           | 22(1)           | 25(1)           | -3(1)           | 1(1)            | -13(1)          |
| C(5)  | 25(1)           | 18(1)           | 21(1)           | 0(1)            | 2(1)            | 0(1)            |
| C(6)  | 16(1)           | 21(1)           | 23(1)           | -3(1)           | -1(1)           | -3(1)           |
| C(7)  | 19(1)           | 21(1)           | 22(1)           | 1(1)            | -2(1)           | -4(1)           |
| C(8)  | 19(1)           | 32(1)           | 23(1)           | 6(1)            | -8(1)           | -5(1)           |
| C(9)  | 22(1)           | 44(1)           | 23(1)           | -2(1)           | -8(1)           | -13(1)          |
| C(10) | 27(1)           | 27(1)           | 25(1)           | -3(1)           | -3(1)           | -11(1)          |
| C(11) | 20(1)           | 19(1)           | 21(1)           | -1(1)           | -5(1)           | -3(1)           |
| C(12) | 15(1)           | 22(1)           | 15(1)           | -2(1)           | -2(1)           | -3(1)           |
| C(13) | 16(1)           | 18(1)           | 22(1)           | 2(1)            | -7(1)           | -4(1)           |
| C(14) | 20(1)           | 24(1)           | 20(1)           | -4(1)           | -3(1)           | -3(1)           |
| C(15) | 26(1)           | 35(1)           | 17(1)           | 1(1)            | -6(1)           | -8(1)           |
| C(16) | 22(1)           | 29(1)           | 21(1)           | 3(1)            | -9(1)           | -5(1)           |
| C(17) | 16(1)           | 20(1)           | 24(1)           | 2(1)            | -8(1)           | -6(1)           |
| C(18) | 19(1)           | 19(1)           | 28(1)           | 2(1)            | -8(1)           | -4(1)           |
| C(19) | 17(1)           | 23(1)           | 28(1)           | -7(1)           | -3(1)           | -3(1)           |
| C(20) | 25(1)           | 24(1)           | 17(1)           | -4(1)           | -2(1)           | -8(1)           |
| C(21) | 20(1)           | 20(1)           | 20(1)           | 2(1)            | -7(1)           | -6(1)           |
| C(22) | 16(1)           | 17(1)           | 21(1)           | 0(1)            | -6(1)           | -7(1)           |

Table 5. Hydrogen coordinates ( $\times 10^4$ ) and isotropic displacement parameters ( $\text{\AA}^2 \times 10^3$ ) for gm01.

|       | x     | y     | z    | U(eq) |
|-------|-------|-------|------|-------|
| H(2)  | 9085  | 6729  | 3135 | 27    |
| H(3)  | 9669  | 9040  | 2550 | 33    |
| H(4)  | 7971  | 11017 | 1499 | 32    |
| H(5)  | 5660  | 10666 | 1017 | 28    |
| H(8)  | 2490  | 7584  | 752  | 31    |
| H(9)  | 1907  | 5235  | 1069 | 34    |
| H(10) | 3515  | 3162  | 2113 | 30    |
| H(11) | 5682  | 3431  | 2865 | 25    |
| H(14) | 6506  | 5305  | 5090 | 26    |
| H(15) | 8253  | 3287  | 6141 | 31    |
| H(16) | 10363 | 1474  | 5084 | 29    |
| H(18) | 11955 | 450   | 3089 | 27    |
| H(19) | 12390 | 655   | 1001 | 28    |
| H(20) | 10682 | 2692  | -45  | 26    |
| H(21) | 8569  | 4509  | 1005 | 23    |

## 1-Naphthalene-10-phenothiazine

Table 1. Crystal data and structure refinement for gm03.

|                                   |                                             |                   |
|-----------------------------------|---------------------------------------------|-------------------|
| Identification code               | gm03                                        |                   |
| Empirical formula                 | C <sub>22</sub> H <sub>15</sub> N S         |                   |
| Formula weight                    | 325.41                                      |                   |
| Temperature                       | 100(2) K                                    |                   |
| Wavelength                        | 0.71073 Å                                   |                   |
| Crystal system                    | Monoclinic                                  |                   |
| Space group                       | P2 <sub>1</sub> /n                          |                   |
| Unit cell dimensions              | a = 14.790(5) Å                             | a = 90°.          |
|                                   | b = 6.904(2) Å                              | b = 113.094(15)°. |
|                                   | c = 17.265(6) Å                             | g = 90°.          |
| Volume                            | 1621.5(10) Å <sup>3</sup>                   |                   |
| Z                                 | 4                                           |                   |
| Density (calculated)              | 1.333 Mg/m <sup>3</sup>                     |                   |
| Absorption coefficient            | 0.201 mm <sup>-1</sup>                      |                   |
| F(000)                            | 680                                         |                   |
| Crystal size                      | 0.202 x 0.200 x 0.063 mm <sup>3</sup>       |                   |
| Theta range for data collection   | 1.542 to 24.710°.                           |                   |
| Index ranges                      | -13<=h<=17, -8<=k<=8, -20<=l<=20            |                   |
| Reflections collected             | 28247                                       |                   |
| Independent reflections           | 2763 [R(int) = 0.1046]                      |                   |
| Completeness to theta = 24.710°   | 99.8 %                                      |                   |
| Absorption correction             | Semi-empirical from equivalents             |                   |
| Max. and min. transmission        | 0.7457 and 0.6585                           |                   |
| Refinement method                 | Full-matrix least-squares on F <sup>2</sup> |                   |
| Data / restraints / parameters    | 2763 / 0 / 217                              |                   |
| Goodness-of-fit on F <sup>2</sup> | 1.045                                       |                   |
| Final R indices [I>2sigma(I)]     | R1 = 0.0422, wR2 = 0.1143                   |                   |
| R indices (all data)              | R1 = 0.0633, wR2 = 0.1254                   |                   |
| Extinction coefficient            | n/a                                         |                   |
| Largest diff. peak and hole       | 0.284 and -0.311 e.Å <sup>-3</sup>          |                   |



Table 2. Atomic coordinates ( $\times 10^4$ ) and equivalent isotropic displacement parameters ( $\text{\AA}^2 \times 10^3$ ) for gm03.  $U(\text{eq})$  is defined as one third of the trace of the orthogonalized  $U^{ij}$  tensor.

|       | x        | y        | z       | $U(\text{eq})$ |
|-------|----------|----------|---------|----------------|
| C(1)  | -215(2)  | 10115(3) | 3208(1) | 17(1)          |
| C(2)  | -763(2)  | 9721(4)  | 3691(2) | 20(1)          |
| C(3)  | -1586(2) | 10817(4) | 3604(2) | 24(1)          |
| C(4)  | -1904(2) | 12296(4) | 3015(2) | 25(1)          |
| C(5)  | -1365(2) | 12699(3) | 2535(2) | 21(1)          |
| C(6)  | -508(2)  | 11693(3) | 2648(1) | 18(1)          |
| C(7)  | 781(2)   | 10373(3) | 2016(2) | 18(1)          |
| C(8)  | 1081(2)  | 10194(4) | 1349(2) | 21(1)          |
| C(9)  | 1590(2)  | 8574(4)  | 1279(2) | 23(1)          |
| C(10) | 1776(2)  | 7097(4)  | 1864(2) | 23(1)          |
| C(11) | 1450(2)  | 7249(3)  | 2517(2) | 19(1)          |
| C(12) | 948(2)   | 8881(3)  | 2608(1) | 15(1)          |
| C(13) | 990(2)   | 7543(3)  | 3922(1) | 17(1)          |
| C(14) | 459(2)   | 5917(3)  | 3893(2) | 21(1)          |
| C(15) | 852(2)   | 4420(4)  | 4489(2) | 24(1)          |
| C(16) | 1780(2)  | 4569(4)  | 5092(2) | 24(1)          |
| C(17) | 2362(2)  | 6237(3)  | 5140(2) | 20(1)          |
| C(18) | 3335(2)  | 6436(4)  | 5746(2) | 25(1)          |
| C(19) | 3872(2)  | 8066(4)  | 5792(2) | 27(1)          |
| C(20) | 3462(2)  | 9618(4)  | 5232(2) | 24(1)          |
| C(21) | 2528(2)  | 9473(4)  | 4630(1) | 20(1)          |
| C(22) | 1957(2)  | 7781(3)  | 4558(1) | 16(1)          |
| N(1)  | 634(1)   | 9030(3)  | 3287(1) | 17(1)          |
| S(1)  | 256(1)   | 12566(1) | 2155(1) | 21(1)          |

Table 3. Bond lengths [ $\text{\AA}$ ] and angles [ $^\circ$ ] for gm03.

---

|                |          |
|----------------|----------|
| C(1)-C(2)      | 1.398(3) |
| C(1)-C(6)      | 1.407(3) |
| C(1)-N(1)      | 1.422(3) |
| C(2)-C(3)      | 1.390(3) |
| C(3)-C(4)      | 1.386(4) |
| C(4)-C(5)      | 1.385(3) |
| C(5)-C(6)      | 1.391(3) |
| C(6)-S(1)      | 1.766(2) |
| C(7)-C(8)      | 1.391(3) |
| C(7)-C(12)     | 1.403(3) |
| C(7)-S(1)      | 1.761(2) |
| C(8)-C(9)      | 1.380(3) |
| C(9)-C(10)     | 1.385(4) |
| C(10)-C(11)    | 1.393(3) |
| C(11)-C(12)    | 1.392(3) |
| C(12)-N(1)     | 1.425(3) |
| C(13)-C(14)    | 1.359(3) |
| C(13)-C(22)    | 1.430(3) |
| C(13)-N(1)     | 1.443(3) |
| C(14)-C(15)    | 1.413(3) |
| C(15)-C(16)    | 1.362(4) |
| C(16)-C(17)    | 1.421(3) |
| C(17)-C(18)    | 1.415(3) |
| C(17)-C(22)    | 1.425(3) |
| C(18)-C(19)    | 1.362(4) |
| C(19)-C(20)    | 1.410(4) |
| C(20)-C(21)    | 1.368(3) |
| C(21)-C(22)    | 1.418(3) |
|                |          |
| C(2)-C(1)-C(6) | 117.8(2) |
| C(2)-C(1)-N(1) | 122.5(2) |
| C(6)-C(1)-N(1) | 119.7(2) |
| C(3)-C(2)-C(1) | 121.1(2) |
| C(4)-C(3)-C(2) | 120.7(2) |

|                   |            |
|-------------------|------------|
| C(5)-C(4)-C(3)    | 118.5(2)   |
| C(4)-C(5)-C(6)    | 121.5(2)   |
| C(5)-C(6)-C(1)    | 120.1(2)   |
| C(5)-C(6)-S(1)    | 118.82(19) |
| C(1)-C(6)-S(1)    | 120.86(18) |
| C(8)-C(7)-C(12)   | 121.0(2)   |
| C(8)-C(7)-S(1)    | 119.34(18) |
| C(12)-C(7)-S(1)   | 119.50(18) |
| C(9)-C(8)-C(7)    | 120.4(2)   |
| C(8)-C(9)-C(10)   | 119.4(2)   |
| C(9)-C(10)-C(11)  | 120.2(2)   |
| C(12)-C(11)-C(10) | 121.4(2)   |
| C(11)-C(12)-C(7)  | 117.5(2)   |
| C(11)-C(12)-N(1)  | 120.8(2)   |
| C(7)-C(12)-N(1)   | 121.7(2)   |
| C(14)-C(13)-C(22) | 120.8(2)   |
| C(14)-C(13)-N(1)  | 121.8(2)   |
| C(22)-C(13)-N(1)  | 117.3(2)   |
| C(13)-C(14)-C(15) | 120.7(2)   |
| C(16)-C(15)-C(14) | 120.3(2)   |
| C(15)-C(16)-C(17) | 120.8(2)   |
| C(18)-C(17)-C(16) | 122.6(2)   |
| C(18)-C(17)-C(22) | 118.2(2)   |
| C(16)-C(17)-C(22) | 119.1(2)   |
| C(19)-C(18)-C(17) | 121.6(2)   |
| C(18)-C(19)-C(20) | 120.2(2)   |
| C(21)-C(20)-C(19) | 120.0(2)   |
| C(20)-C(21)-C(22) | 121.1(2)   |
| C(21)-C(22)-C(17) | 118.9(2)   |
| C(21)-C(22)-C(13) | 122.9(2)   |
| C(17)-C(22)-C(13) | 118.2(2)   |
| C(1)-N(1)-C(12)   | 121.29(18) |
| C(1)-N(1)-C(13)   | 119.55(18) |
| C(12)-N(1)-C(13)  | 115.79(18) |
| C(7)-S(1)-C(6)    | 99.90(11)  |

Table 4. Anisotropic displacement parameters ( $\text{\AA}^2 \times 10^3$ ) for gm03. The anisotropic displacement factor exponent takes the form:  $-2p^2[ h^2 a^*2U^{11} + \dots + 2 h k a^* b^* U^{12} ]$

|       | U <sup>11</sup> | U <sup>22</sup> | U <sup>33</sup> | U <sup>23</sup> | U <sup>13</sup> | U <sup>12</sup> |
|-------|-----------------|-----------------|-----------------|-----------------|-----------------|-----------------|
| C(1)  | 15(1)           | 18(1)           | 16(1)           | -5(1)           | 5(1)            | -2(1)           |
| C(2)  | 20(1)           | 21(1)           | 19(1)           | -4(1)           | 7(1)            | -5(1)           |
| C(3)  | 21(1)           | 29(2)           | 25(1)           | -9(1)           | 12(1)           | -4(1)           |
| C(4)  | 19(1)           | 30(2)           | 26(1)           | -5(1)           | 9(1)            | 3(1)            |
| C(5)  | 19(1)           | 20(1)           | 21(1)           | -3(1)           | 5(1)            | 2(1)            |
| C(6)  | 18(1)           | 19(1)           | 15(1)           | -5(1)           | 6(1)            | -3(1)           |
| C(7)  | 12(1)           | 19(1)           | 20(1)           | -2(1)           | 4(1)            | -3(1)           |
| C(8)  | 20(1)           | 24(1)           | 18(1)           | 2(1)            | 7(1)            | -2(1)           |
| C(9)  | 22(1)           | 29(2)           | 22(1)           | -2(1)           | 13(1)           | -1(1)           |
| C(10) | 17(1)           | 28(2)           | 23(1)           | -3(1)           | 8(1)            | 2(1)            |
| C(11) | 15(1)           | 22(1)           | 19(1)           | 2(1)            | 5(1)            | -1(1)           |
| C(12) | 11(1)           | 19(1)           | 13(1)           | -3(1)           | 3(1)            | -4(1)           |
| C(13) | 19(1)           | 18(1)           | 15(1)           | 0(1)            | 10(1)           | 3(1)            |
| C(14) | 22(1)           | 23(1)           | 19(1)           | -4(1)           | 10(1)           | -3(1)           |
| C(15) | 33(2)           | 20(1)           | 24(1)           | -4(1)           | 16(1)           | -5(1)           |
| C(16) | 34(2)           | 19(1)           | 22(1)           | 4(1)            | 14(1)           | 3(1)            |
| C(17) | 23(1)           | 22(1)           | 17(1)           | 1(1)            | 12(1)           | 6(1)            |
| C(18) | 26(1)           | 28(2)           | 20(1)           | 6(1)            | 9(1)            | 9(1)            |
| C(19) | 17(1)           | 36(2)           | 22(1)           | 2(1)            | 3(1)            | 2(1)            |
| C(20) | 21(1)           | 25(1)           | 24(1)           | 1(1)            | 7(1)            | -3(1)           |
| C(21) | 21(1)           | 22(1)           | 16(1)           | 4(1)            | 8(1)            | 3(1)            |
| C(22) | 17(1)           | 19(1)           | 14(1)           | -2(1)           | 9(1)            | 2(1)            |
| N(1)  | 14(1)           | 21(1)           | 15(1)           | 1(1)            | 6(1)            | 2(1)            |
| S(1)  | 24(1)           | 18(1)           | 24(1)           | 2(1)            | 12(1)           | 1(1)            |

Table 5. Hydrogen coordinates ( $\times 10^4$ ) and isotropic displacement parameters ( $\text{\AA}^2 \times 10^3$ ) for gm03.

|       | x     | y     | z    | U(eq) |
|-------|-------|-------|------|-------|
| H(2)  | -569  | 8688  | 4085 | 24    |
| H(3)  | -1934 | 10549 | 3951 | 29    |
| H(4)  | -2479 | 13016 | 2942 | 30    |
| H(5)  | -1586 | 13686 | 2119 | 25    |
| H(8)  | 934   | 11193 | 940  | 25    |
| H(9)  | 1812  | 8474  | 833  | 27    |
| H(10) | 2125  | 5977  | 1819 | 27    |
| H(11) | 1574  | 6216  | 2909 | 23    |
| H(14) | -182  | 5786  | 3467 | 25    |
| H(15) | 468   | 3304  | 4470 | 29    |
| H(16) | 2040  | 3546  | 5485 | 29    |
| H(18) | 3620  | 5408  | 6130 | 30    |
| H(19) | 4526  | 8159  | 6202 | 32    |
| H(20) | 3833  | 10763 | 5274 | 28    |
| H(21) | 2258  | 10522 | 4254 | 23    |

## 7. Coordinates of Molecular Structures

All coordinates are reported as XYZ Cartesian coordinates. Energies computed at uM06/6-311+G\*\*/CPCM-H<sub>2</sub>O level of theory (reported in parentheses) are arranged in the following order: E<sub>0K</sub> (not ZPE and thermally corrected), H (298 K) and G (298 K). They are stated in Hartrees units. All energies reported were calculated using the GAUSSIAN 09 computational chemistry package.

### 10-Phenylphenoxazine (1)

Neutral ground state (-823.3084106, -823.0332097, -823.0941837)

|   |          |          |          |
|---|----------|----------|----------|
| C | -6.47170 | -0.93850 | 0.09685  |
| C | -5.07759 | -0.87165 | 0.05607  |
| C | -4.44481 | 0.35333  | -0.05771 |
| C | -5.17842 | 1.54709  | -0.12655 |
| C | -6.57112 | 1.46920  | -0.08219 |
| C | -7.21247 | 0.23429  | 0.02621  |
| C | -3.09640 | 2.77371  | -0.13421 |
| C | -2.40688 | 1.55352  | -0.06602 |
| C | -1.02827 | 1.51415  | 0.03982  |
| H | -0.54300 | 0.54233  | 0.09116  |
| C | -0.29327 | 2.70108  | 0.07204  |
| C | -0.96103 | 3.91716  | 0.00237  |
| C | -2.35270 | 3.95370  | -0.09694 |
| H | -6.96420 | -1.90316 | 0.18325  |
| H | -4.46257 | -1.76703 | 0.10549  |
| H | -7.15702 | 2.38346  | -0.13711 |
| H | 0.78972  | 2.66497  | 0.15026  |
| H | -2.86834 | 4.90930  | -0.15154 |
| H | -8.29845 | 0.20147  | 0.05537  |
| H | -0.40651 | 4.85179  | 0.02515  |
| N | -4.49249 | 2.76241  | -0.24920 |
| C | -5.21659 | 3.99274  | -0.29382 |
| C | -5.60411 | 4.61754  | 0.89017  |
| C | -5.52463 | 4.55861  | -1.52837 |
| C | -6.30658 | 5.81844  | 0.83559  |
| H | -5.35138 | 4.15548  | 1.84312  |
| C | -6.22626 | 5.76092  | -1.57918 |
| H | -5.21008 | 4.04985  | -2.43758 |
| C | -6.61665 | 6.38972  | -0.39830 |
| H | -6.61211 | 6.30903  | 1.75638  |
| H | -6.46797 | 6.20638  | -2.54092 |
| H | -7.16582 | 7.32715  | -0.43861 |
| O | -3.06940 | 0.34747  | -0.12574 |

Neutral triplet state (-823.2051752, -822.9347994, -822.9954884)

|   |          |         |          |
|---|----------|---------|----------|
| C | -2.05707 | 3.57872 | -0.00028 |
|---|----------|---------|----------|

|   |          |          |          |
|---|----------|----------|----------|
| C | -2.70556 | 2.35879  | -0.00032 |
| C | -1.96995 | 1.17515  | -0.00012 |
| C | -0.52259 | 1.20062  | 0.00022  |
| C | 0.11706  | 2.46345  | 0.00030  |
| C | -0.61945 | 3.62184  | 0.00009  |
| C | -0.52268 | -1.20060 | -0.00015 |
| C | -1.97002 | -1.17503 | 0.00022  |
| C | -2.70571 | -2.35862 | 0.00025  |
| H | -3.79126 | -2.28861 | 0.00047  |
| C | -2.05732 | -3.57859 | -0.00002 |
| C | -0.61972 | -3.62181 | -0.00030 |
| C | 0.11688  | -2.46346 | -0.00037 |
| H | -2.63086 | 4.50094  | -0.00056 |
| H | -3.79111 | 2.28886  | -0.00049 |
| H | 1.20368  | 2.50741  | 0.00057  |
| H | -2.63117 | -4.50077 | 0.00002  |
| H | 1.20349  | -2.50750 | -0.00059 |
| H | -0.10880 | 4.58093  | 0.00023  |
| H | -0.10913 | -4.58094 | -0.00052 |
| N | 0.14782  | -0.00002 | -0.00007 |
| C | 1.58549  | -0.00006 | -0.00002 |
| C | 2.26173  | -0.00022 | 1.21413  |
| C | 2.26181  | 0.00009  | -1.21413 |
| C | 3.65494  | -0.00024 | 1.20946  |
| H | 1.69630  | -0.00031 | 2.14382  |
| C | 3.65502  | 0.00004  | -1.20937 |
| H | 1.69644  | 0.00022  | -2.14385 |
| C | 4.34843  | -0.00012 | 0.00007  |
| H | 4.19785  | -0.00036 | 2.15092  |
| H | 4.19800  | 0.00014  | -2.15079 |
| H | 5.43533  | -0.00016 | 0.00011  |
| O | -2.63892 | 0.00008  | 0.00039  |

Cation radical state (-823.1214782, -822.8453124, -822.9040004)

|   |          |          |          |
|---|----------|----------|----------|
| C | -6.45178 | -0.91926 | 0.01108  |
| C | -5.06954 | -0.87583 | 0.03715  |
| C | -4.43447 | 0.35924  | -0.00534 |
| C | -5.17164 | 1.56228  | -0.07584 |
| C | -6.57568 | 1.49671  | -0.10130 |
| C | -7.20084 | 0.26837  | -0.05719 |
| C | -3.10482 | 2.77640  | -0.07523 |
| C | -2.41266 | 1.54637  | -0.00361 |
| C | -1.02520 | 1.49995  | 0.04234  |
| H | -0.53698 | 0.53184  | 0.09893  |
| C | -0.31368 | 2.68603  | 0.01752  |
| C | -0.98637 | 3.91859  | -0.05413 |

|   |          |          |          |
|---|----------|----------|----------|
| C | -2.36349 | 3.97013  | -0.10110 |
| H | -6.95950 | -1.87834 | 0.04526  |
| H | -4.46181 | -1.77389 | 0.08979  |
| H | -7.15639 | 2.41236  | -0.15291 |
| H | 0.77099  | 2.66276  | 0.05431  |
| H | -2.88066 | 4.92287  | -0.15642 |
| H | -8.28512 | 0.22145  | -0.07545 |
| H | -0.41754 | 4.84302  | -0.07252 |
| N | -4.48471 | 2.75939  | -0.11793 |
| C | -5.21597 | 4.00142  | -0.21499 |
| C | -5.58720 | 4.65763  | 0.95250  |
| C | -5.52580 | 4.49708  | -1.47613 |
| C | -6.29451 | 5.85184  | 0.84780  |
| H | -5.32463 | 4.23571  | 1.92002  |
| C | -6.23372 | 5.69182  | -1.56569 |
| H | -5.21736 | 3.95093  | -2.36488 |
| C | -6.61627 | 6.36571  | -0.40718 |
| H | -6.59394 | 6.38014  | 1.74854  |
| H | -6.48615 | 6.09493  | -2.54242 |
| H | -7.16976 | 7.29777  | -0.48301 |
| O | -3.08191 | 0.37051  | 0.02336  |

#### 4-Trifluoromethylphenyl -10-phenoxazine (2)

Neutral ground state (-1160.343866, -1160.06003, -1160.127372)

|   |          |          |          |
|---|----------|----------|----------|
| C | -6.46905 | -0.92247 | -0.14086 |
| C | -5.07835 | -0.85574 | -0.04351 |
| C | -4.44827 | 0.37238  | 0.05624  |
| C | -5.18182 | 1.56704  | 0.05366  |
| C | -6.57108 | 1.48956  | -0.05123 |
| C | -7.20994 | 0.25246  | -0.14368 |
| C | -3.09698 | 2.79019  | 0.05601  |
| C | -2.41196 | 1.56656  | 0.05523  |
| C | -1.03266 | 1.51800  | -0.04326 |
| H | -0.55005 | 0.54360  | -0.04334 |
| C | -0.29482 | 2.69951  | -0.13101 |
| C | -0.95859 | 3.92006  | -0.12180 |
| C | -2.35006 | 3.96500  | -0.03129 |
| H | -6.95988 | -1.88897 | -0.21485 |
| H | -4.46356 | -1.75253 | -0.03933 |
| H | -7.16022 | 2.40329  | -0.05330 |
| H | 0.78829  | 2.65655  | -0.20344 |
| H | -2.86065 | 4.92467  | -0.02079 |
| H | -8.29361 | 0.21968  | -0.21877 |
| H | -0.40108 | 4.85088  | -0.18519 |
| N | -4.49712 | 2.78878  | 0.17315  |
| C | -5.21634 | 4.00657  | -0.01739 |



|   |          |         |          |
|---|----------|---------|----------|
| C | -5.72179 | 4.68463 | 1.08590  |
| C | -5.41598 | 4.49943 | -1.30838 |
| C | -6.43414 | 5.86744 | 0.90541  |
| H | -5.55734 | 4.27912 | 2.08125  |
| C | -6.12213 | 5.67829 | -1.49190 |
| H | -5.01277 | 3.95207 | -2.15794 |
| C | -6.62915 | 6.35763 | -0.38156 |
| H | -6.83208 | 6.40223 | 1.76256  |
| H | -6.28065 | 6.07131 | -2.49366 |
| O | -3.07795 | 0.36893 | 0.18721  |
| C | -7.38236 | 7.62869 | -0.62022 |
| F | -7.82839 | 8.19358 | 0.50842  |
| F | -8.45499 | 7.43296 | -1.41237 |
| F | -6.62144 | 8.54886 | -1.24510 |

Neutral triplet state (-1160.239871, -1159.961263, -1160.030893)

|   |          |          |          |
|---|----------|----------|----------|
| C | -6.46098 | -0.93808 | 0.00090  |
| C | -5.08239 | -0.88036 | 0.02944  |
| C | -4.43368 | 0.35467  | 0.00169  |
| C | -5.18691 | 1.58342  | -0.05943 |
| C | -6.59782 | 1.49664  | -0.09596 |
| C | -7.22405 | 0.27419  | -0.06418 |
| C | -3.11494 | 2.80465  | -0.04234 |
| C | -2.40450 | 1.53981  | -0.01621 |
| C | -1.01079 | 1.50539  | -0.00365 |
| H | -0.52080 | 0.53429  | 0.01539  |
| C | -0.28834 | 2.68141  | -0.01291 |
| C | -0.97994 | 3.94699  | -0.03164 |
| C | -2.35140 | 3.99493  | -0.04755 |
| H | -6.96594 | -1.89943 | 0.02566  |
| H | -4.47283 | -1.78020 | 0.07232  |
| H | -7.18702 | 2.40931  | -0.14686 |
| H | 0.79729  | 2.65441  | -0.00518 |
| H | -2.86372 | 4.95427  | -0.06366 |
| H | -8.30911 | 0.22828  | -0.08951 |
| H | -0.41083 | 4.87236  | -0.03224 |
| N | -4.48957 | 2.77057  | -0.08440 |
| C | -5.21628 | 4.00282  | -0.18732 |
| C | -5.68299 | 4.61119  | 0.97001  |
| C | -5.43711 | 4.55130  | -1.44610 |
| C | -6.39730 | 5.80343  | 0.86786  |
| H | -5.49104 | 4.15222  | 1.93677  |
| C | -6.14704 | 5.74065  | -1.54617 |
| H | -5.05491 | 4.04577  | -2.32967 |
| C | -6.62373 | 6.35858  | -0.38718 |
| H | -6.77192 | 6.29133  | 1.76228  |

|   |          |         |          |
|---|----------|---------|----------|
| H | -6.32955 | 6.18633 | -2.52097 |
| O | -3.08257 | 0.37122 | 0.01253  |
| C | -7.38295 | 7.63997 | -0.54129 |
| F | -7.80205 | 8.14696 | 0.62427  |
| F | -8.47384 | 7.48074 | -1.31584 |
| F | -6.63743 | 8.59026 | -1.13797 |

Cation radical state (-1160.15447, -1159.869849, -1159.936687)

|   |          |          |          |
|---|----------|----------|----------|
| C | -6.45274 | -0.91562 | 0.00179  |
| C | -5.07087 | -0.87065 | 0.02931  |
| C | -4.43728 | 0.36547  | -0.00796 |
| C | -5.17640 | 1.56784  | -0.07170 |
| C | -6.57981 | 1.50076  | -0.10409 |
| C | -7.20313 | 0.27132  | -0.06582 |
| C | -3.10729 | 2.78423  | -0.06603 |
| C | -2.41552 | 1.55309  | -0.00931 |
| C | -1.02769 | 1.50594  | 0.02624  |
| H | -0.53945 | 0.53722  | 0.06966  |
| C | -0.31635 | 2.69194  | 0.00795  |
| C | -0.98937 | 3.92553  | -0.04327 |
| C | -2.36672 | 3.97810  | -0.07999 |
| H | -6.95953 | -1.87526 | 0.03210  |
| H | -4.46180 | -1.76798 | 0.07800  |
| H | -7.16418 | 2.41401  | -0.15700 |
| H | 0.76853  | 2.66833  | 0.03569  |
| H | -2.88170 | 4.93285  | -0.11783 |
| H | -8.28721 | 0.22321  | -0.08887 |
| H | -0.42060 | 4.85006  | -0.05347 |
| N | -4.48797 | 2.76532  | -0.10430 |
| C | -5.21854 | 4.00537  | -0.19721 |
| C | -5.67648 | 4.60662  | 0.96667  |
| C | -5.44374 | 4.55432  | -1.45546 |
| C | -6.38884 | 5.79796  | 0.87025  |
| H | -5.48072 | 4.14698  | 1.93207  |
| C | -6.15183 | 5.74376  | -1.54432 |
| H | -5.06872 | 4.05403  | -2.34470 |
| C | -6.62111 | 6.35739  | -0.38213 |
| H | -6.75779 | 6.28207  | 1.76876  |
| H | -6.33778 | 6.19233  | -2.51692 |
| O | -3.08514 | 0.37806  | 0.01549  |
| C | -7.38105 | 7.64199  | -0.52895 |
| F | -7.79457 | 8.14190  | 0.64019  |
| F | -8.47182 | 7.48202  | -1.30044 |
| F | -6.63372 | 8.58973  | -1.12352 |

### 1-Naphthalene-10-phenoxazine (3)

Neutral ground state (-976.8692387, -976.5445874, -976.6089664)

|   |          |          |          |
|---|----------|----------|----------|
| C | -6.48220 | -0.91004 | -0.14773 |
| C | -5.09111 | -0.84754 | -0.05341 |
| C | -4.45366 | 0.37968  | 0.00914  |
| C | -5.18084 | 1.57800  | -0.02733 |
| C | -6.57095 | 1.50380  | -0.12522 |
| C | -7.21702 | 0.26854  | -0.18171 |
| C | -3.09227 | 2.79247  | -0.01363 |
| C | -2.41076 | 1.56697  | 0.02523  |
| C | -1.02870 | 1.51448  | -0.01862 |
| H | -0.54914 | 0.53908  | 0.01548  |
| C | -0.28461 | 2.69279  | -0.09668 |
| C | -0.94526 | 3.91467  | -0.13532 |
| C | -2.33885 | 3.96366  | -0.09684 |
| H | -6.97823 | -1.87564 | -0.19396 |
| H | -4.48122 | -1.74725 | -0.02324 |
| H | -7.15206 | 2.42257  | -0.15060 |
| H | 0.80037  | 2.64614  | -0.12670 |
| H | -2.85071 | 4.92261  | -0.12632 |
| H | -8.30107 | 0.23948  | -0.25389 |
| H | -0.38299 | 4.84284  | -0.19633 |
| N | -4.49431 | 2.80040  | 0.04093  |
| C | -5.20688 | 4.02223  | -0.15494 |
| C | -5.63053 | 4.74140  | 0.93586  |
| C | -5.47425 | 4.47220  | -1.47974 |
| C | -6.34581 | 5.94731  | 0.76461  |
| H | -5.40809 | 4.36501  | 1.93234  |
| C | -6.20350 | 5.68713  | -1.64528 |
| C | -6.62674 | 6.40649  | -0.49843 |
| H | -6.67232 | 6.50550  | 1.63800  |
| H | -7.17997 | 7.33348  | -0.63960 |
| O | -3.08280 | 0.37023  | 0.13652  |
| C | -6.48699 | 6.14391  | -2.95771 |
| C | -5.05028 | 3.76057  | -2.63024 |
| C | -5.34103 | 4.23130  | -3.88813 |
| H | -5.01211 | 3.67628  | -4.76325 |
| C | -6.06712 | 5.43272  | -4.05511 |
| H | -6.29034 | 5.79178  | -5.05670 |
| H | -7.04491 | 7.07119  | -3.07740 |
| H | -4.49131 | 2.83453  | -2.50749 |

Neutral triplet state (-976.7761436, -976.4554405, -976.5210735)

|   |          |          |         |
|---|----------|----------|---------|
| C | -6.43760 | -1.00121 | 0.58349 |
| C | -5.04921 | -0.89641 | 0.58096 |

|   |          |          |          |
|---|----------|----------|----------|
| C | -4.44987 | 0.31871  | 0.29202  |
| C | -5.21784 | 1.46134  | 0.01326  |
| C | -6.61149 | 1.32833  | -0.02616 |
| C | -7.21480 | 0.11129  | 0.26902  |
| C | -3.17356 | 2.69867  | -0.32058 |
| C | -2.45817 | 1.51954  | -0.06980 |
| C | -1.07102 | 1.49751  | -0.10184 |
| H | -0.56662 | 0.55570  | 0.09842  |
| C | -0.36575 | 2.66502  | -0.37005 |
| C | -1.06160 | 3.85414  | -0.58451 |
| C | -2.45061 | 3.87217  | -0.55246 |
| H | -6.90590 | -1.95536 | 0.80819  |
| H | -4.41107 | -1.75031 | 0.79258  |
| H | -7.21648 | 2.18760  | -0.30284 |
| H | 0.72000  | 2.64768  | -0.39529 |
| H | -2.98842 | 4.80338  | -0.70491 |
| H | -8.29776 | 0.03204  | 0.23572  |
| H | -0.52262 | 4.77907  | -0.77064 |
| N | -4.58164 | 2.67728  | -0.27166 |
| C | -5.35019 | 3.84951  | -0.40021 |
| C | -6.09472 | 4.29961  | 0.76134  |
| C | -5.39875 | 4.56358  | -1.63787 |
| C | -6.75073 | 5.49403  | 0.71991  |
| H | -6.05211 | 3.70289  | 1.66978  |
| C | -6.11238 | 5.81560  | -1.66061 |
| C | -6.75779 | 6.27117  | -0.47495 |
| H | -7.26562 | 5.86577  | 1.60249  |
| H | -7.29250 | 7.21897  | -0.50414 |
| O | -3.08299 | 0.34549  | 0.25726  |
| C | -6.17825 | 6.53026  | -2.86299 |
| C | -4.83200 | 4.08731  | -2.82568 |
| C | -4.90996 | 4.83603  | -4.02759 |
| H | -4.44264 | 4.44679  | -4.92901 |
| C | -5.56847 | 6.04397  | -4.04565 |
| H | -5.62930 | 6.62770  | -4.96105 |
| H | -6.72408 | 7.47264  | -2.88114 |
| H | -4.32605 | 3.12345  | -2.82625 |

Cation radical state (-976.6811041, -976.3556374, -976.4197774)

|   |          |          |          |
|---|----------|----------|----------|
| C | -6.45142 | -0.91807 | 0.00392  |
| C | -5.07018 | -0.87767 | 0.05999  |
| C | -4.43075 | 0.35503  | 0.00810  |
| C | -5.16328 | 1.55834  | -0.09731 |
| C | -6.56615 | 1.49578  | -0.15553 |
| C | -7.19559 | 0.27005  | -0.10420 |
| C | -3.09263 | 2.76650  | -0.09005 |

|   |          |          |          |
|---|----------|----------|----------|
| C | -2.40576 | 1.53611  | 0.01606  |
| C | -1.01878 | 1.48638  | 0.07783  |
| H | -0.53461 | 0.51832  | 0.16298  |
| C | -0.30343 | 2.66922  | 0.03101  |
| C | -0.97113 | 3.90200  | -0.07842 |
| C | -2.34750 | 3.95680  | -0.13944 |
| H | -6.96271 | -1.87500 | 0.04436  |
| H | -4.46638 | -1.77610 | 0.14230  |
| H | -7.14216 | 2.41249  | -0.23662 |
| H | 0.78074  | 2.64363  | 0.07916  |
| H | -2.86217 | 4.90914  | -0.22282 |
| H | -8.27923 | 0.22520  | -0.14794 |
| H | -0.39874 | 4.82366  | -0.11497 |
| N | -4.47274 | 2.75407  | -0.14690 |
| C | -5.19883 | 3.99541  | -0.27646 |
| C | -5.59106 | 4.65108  | 0.86264  |
| C | -5.48089 | 4.48238  | -1.57960 |
| C | -6.30778 | 5.86142  | 0.75435  |
| H | -5.34785 | 4.23121  | 1.83620  |
| C | -6.20844 | 5.70634  | -1.67054 |
| C | -6.60797 | 6.37216  | -0.48471 |
| H | -6.61834 | 6.38072  | 1.65607  |
| H | -7.16234 | 7.30424  | -0.57562 |
| O | -3.07916 | 0.36350  | 0.06281  |
| C | -6.51380 | 6.22476  | -2.95389 |
| C | -5.08164 | 3.82035  | -2.76678 |
| C | -5.39521 | 4.35299  | -3.99401 |
| H | -5.08523 | 3.83828  | -4.89967 |
| C | -6.11744 | 5.56408  | -4.09040 |
| H | -6.35666 | 5.97029  | -5.06962 |
| H | -7.07027 | 7.15778  | -3.01844 |
| H | -4.52307 | 2.88808  | -2.70727 |

### 2-Naphthalene-10-phenoxazine (4)

Neutral ground state (-976.8676392, -976.5431588, -976.6086008)

|   |          |          |          |
|---|----------|----------|----------|
| C | -6.46217 | -0.92603 | 0.16189  |
| C | -5.06875 | -0.86207 | 0.10323  |
| C | -4.43938 | 0.35471  | -0.08907 |
| C | -5.17422 | 1.54208  | -0.21990 |
| C | -6.56610 | 1.46793  | -0.15308 |
| C | -7.20466 | 0.24105  | 0.03281  |
| C | -3.09928 | 2.77191  | -0.22169 |
| C | -2.41049 | 1.55717  | -0.09025 |
| C | -1.04094 | 1.52477  | 0.10197  |
| H | -0.55633 | 0.55605  | 0.19825  |
| C | -0.31439 | 2.71569  | 0.15799  |

|   |          |          |          |
|---|----------|----------|----------|
| C | -0.98154 | 3.92725  | 0.02694  |
| C | -2.36474 | 3.95632  | -0.15747 |
| H | -6.95358 | -1.88430 | 0.30628  |
| H | -4.45275 | -1.75321 | 0.19609  |
| H | -7.15300 | 2.37736  | -0.25621 |
| H | 0.76209  | 2.68691  | 0.30202  |
| H | -2.87848 | 4.90878  | -0.26213 |
| H | -8.29022 | 0.20934  | 0.07513  |
| H | -0.43276 | 4.86468  | 0.06709  |
| N | -4.48628 | 2.74655  | -0.43455 |
| C | -5.21511 | 3.97471  | -0.47561 |
| C | -5.59461 | 4.60439  | 0.73502  |
| C | -5.53645 | 4.52998  | -1.68781 |
| C | -6.29197 | 5.78551  | 0.70184  |
| H | -5.32310 | 4.13546  | 1.67943  |
| C | -6.25528 | 5.75007  | -1.75089 |
| C | -6.63987 | 6.38958  | -0.53485 |
| H | -6.58851 | 6.27661  | 1.62711  |
| O | -3.06578 | 0.34949  | -0.18911 |
| C | -6.60058 | 6.35153  | -2.98699 |
| C | -7.35757 | 7.61033  | -0.59994 |
| H | -7.65000 | 8.09555  | 0.32990  |
| C | -7.67836 | 8.17103  | -1.81294 |
| H | -8.23007 | 9.10716  | -1.85067 |
| C | -7.29648 | 7.53603  | -3.01760 |
| H | -7.55694 | 7.99044  | -3.97036 |
| H | -6.30352 | 5.85774  | -3.91074 |
| H | -5.23561 | 4.02856  | -2.60693 |

Neutral triplet state (-976.773159, -976.452774, -976.518417)

|   |          |          |          |
|---|----------|----------|----------|
| C | -6.35570 | -1.07156 | 0.42310  |
| C | -5.01033 | -0.92681 | 0.10292  |
| C | -4.46425 | 0.33955  | -0.03861 |
| C | -5.23641 | 1.49805  | 0.15081  |
| C | -6.59107 | 1.33403  | 0.45491  |
| C | -7.14310 | 0.06451  | 0.58922  |
| C | -3.22812 | 2.79358  | -0.18018 |
| C | -2.51446 | 1.60435  | -0.38674 |
| C | -1.13927 | 1.60887  | -0.55003 |
| H | -0.63389 | 0.66027  | -0.71137 |
| C | -0.44165 | 2.81392  | -0.49938 |
| C | -1.12770 | 4.00084  | -0.25470 |
| C | -2.50783 | 3.99050  | -0.08072 |
| H | -6.78381 | -2.06379 | 0.53387  |
| H | -4.36355 | -1.78520 | -0.05845 |
| H | -7.22383 | 2.20667  | 0.57259  |

|   |          |          |          |
|---|----------|----------|----------|
| H | 0.63696  | 2.81763  | -0.62865 |
| H | -3.03959 | 4.91081  | 0.14477  |
| H | -8.19943 | -0.02927 | 0.82574  |
| H | -0.58873 | 4.94128  | -0.18071 |
| N | -4.62389 | 2.75488  | -0.04027 |
| C | -5.34076 | 3.96132  | -0.15262 |
| C | -6.21741 | 4.41336  | 0.80870  |
| C | -5.16471 | 4.71840  | -1.38856 |
| C | -6.95112 | 5.59348  | 0.59712  |
| H | -6.32400 | 3.87220  | 1.74612  |
| C | -5.92901 | 5.87241  | -1.63786 |
| C | -6.84412 | 6.34036  | -0.62435 |
| H | -7.61170 | 5.96548  | 1.37803  |
| O | -3.15062 | 0.39496  | -0.42637 |
| C | -5.82299 | 6.60103  | -2.84229 |
| C | -7.58275 | 7.49207  | -0.86592 |
| H | -8.27482 | 7.84563  | -0.10265 |
| C | -7.45239 | 8.21648  | -2.08837 |
| H | -8.04502 | 9.11458  | -2.24449 |
| C | -6.58326 | 7.77277  | -3.05821 |
| H | -6.47850 | 8.31382  | -3.99574 |
| H | -5.13556 | 6.24648  | -3.60909 |
| H | -4.49942 | 4.32918  | -2.15737 |

Cation radical state (-976.6803742, -976.3548851, -976.4193681)

|   |          |          |          |
|---|----------|----------|----------|
| C | -6.46573 | -0.89297 | -0.05233 |
| C | -5.08382 | -0.85432 | -0.00746 |
| C | -4.44377 | 0.37838  | -0.04379 |
| C | -5.17555 | 1.58361  | -0.13180 |
| C | -6.57943 | 1.52313  | -0.17208 |
| C | -7.20963 | 0.29730  | -0.13099 |
| C | -3.10499 | 2.79080  | -0.09872 |
| C | -2.41865 | 1.55907  | -0.00484 |
| C | -1.03271 | 1.50866  | 0.07297  |
| H | -0.54891 | 0.53930  | 0.14441  |
| C | -0.31722 | 2.69251  | 0.05934  |
| C | -0.98417 | 3.92669  | -0.03462 |
| C | -2.35968 | 3.98209  | -0.11527 |
| H | -6.97736 | -1.85015 | -0.02337 |
| H | -4.48017 | -1.75444 | 0.05582  |
| H | -7.15604 | 2.44077  | -0.23220 |
| H | 0.76625  | 2.66609  | 0.12121  |
| H | -2.87263 | 4.93580  | -0.19057 |
| H | -8.29384 | 0.25447  | -0.16025 |
| H | -0.41206 | 4.84920  | -0.04503 |
| N | -4.48349 | 2.77785  | -0.17557 |

|   |          |         |          |
|---|----------|---------|----------|
| C | -5.20824 | 4.02112 | -0.29551 |
| C | -5.55742 | 4.71569 | 0.88234  |
| C | -5.53592 | 4.47781 | -1.54502 |
| C | -6.25275 | 5.89363 | 0.77213  |
| H | -5.27182 | 4.31033 | 1.85027  |
| C | -6.25453 | 5.69024 | -1.67552 |
| C | -6.61927 | 6.40942 | -0.49745 |
| H | -6.53364 | 6.44745 | 1.66550  |
| O | -3.09190 | 0.38528 | 0.00835  |
| C | -6.62313 | 6.20314 | -2.94425 |
| C | -7.34090 | 7.62171 | -0.63210 |
| H | -7.61732 | 8.16920 | 0.26701  |
| C | -7.68547 | 8.09510 | -1.87466 |
| H | -8.24000 | 9.02547 | -1.96712 |
| C | -7.32397 | 7.38012 | -3.04050 |
| H | -7.60520 | 7.76772 | -4.01630 |
| H | -6.34193 | 5.64770 | -3.83692 |
| H | -5.25077 | 3.91214 | -2.43094 |

### 3,7-Di(4-biphenyl)1-Naphthalene-10-Phenoxazine (5)

Neutral ground state (-1900.582243, -1899.909858, -1900.018478)

|   |          |          |          |
|---|----------|----------|----------|
| C | -6.42073 | -0.92021 | 0.69406  |
| C | -5.01314 | -0.81296 | 0.67314  |
| C | -4.39886 | 0.41002  | 0.45459  |
| C | -5.14437 | 1.58925  | 0.24065  |
| C | -6.54267 | 1.48586  | 0.26106  |
| C | -7.16764 | 0.25336  | 0.48509  |
| C | -3.06701 | 2.82051  | -0.07160 |
| C | -2.34293 | 1.62882  | 0.14766  |
| C | -0.95980 | 1.59104  | 0.07161  |
| H | -0.46754 | 0.63430  | 0.22400  |
| C | -0.22235 | 2.75664  | -0.22868 |
| C | -0.93939 | 3.94667  | -0.44826 |
| C | -2.33720 | 3.97943  | -0.37188 |
| H | -4.37634 | -1.68419 | 0.80027  |
| H | -7.14486 | 2.37708  | 0.11175  |
| H | -2.86602 | 4.91385  | -0.53538 |
| H | -8.25273 | 0.22053  | 0.52147  |
| H | -0.40610 | 4.87054  | -0.65380 |
| N | -4.47293 | 2.80846  | 0.01919  |
| C | -5.22693 | 4.00183  | -0.24391 |
| C | -5.60019 | 4.81778  | 0.80742  |
| C | -5.59376 | 4.31557  | -1.58956 |
| C | -6.36401 | 5.99258  | 0.56712  |
| H | -5.30510 | 4.54676  | 1.81727  |
| C | -6.36401 | 5.50012  | -1.82530 |



|   |          |          |          |
|---|----------|----------|----------|
| C | -6.73751 | 6.32358  | -0.72312 |
| H | -6.65100 | 6.62277  | 1.40216  |
| H | -7.32362 | 7.21886  | -0.91572 |
| O | -2.99420 | 0.42183  | 0.45179  |
| C | -6.73970 | 5.82723  | -3.16074 |
| C | -5.22191 | 3.49507  | -2.69337 |
| C | -5.60047 | 3.83889  | -3.97946 |
| H | -5.31402 | 3.21142  | -4.81754 |
| C | -6.36706 | 5.01516  | -4.21693 |
| H | -6.65561 | 5.26957  | -5.23180 |
| H | -7.32409 | 6.72764  | -3.33377 |
| H | -4.63593 | 2.59739  | -2.51094 |
| C | 1.25441  | 2.72035  | -0.30292 |
| C | 1.96220  | 3.57109  | -1.17735 |
| C | 2.00396  | 1.83282  | 0.49697  |
| C | 3.35737  | 3.53741  | -1.24694 |
| H | 1.41736  | 4.25504  | -1.82351 |
| C | 3.39880  | 1.79824  | 0.42589  |
| H | 1.49481  | 1.17385  | 1.19605  |
| C | 4.10659  | 2.65027  | -0.44674 |
| H | 3.86924  | 4.22157  | -1.91923 |
| H | 3.94209  | 1.08815  | 1.04468  |
| C | -7.07907 | -2.22466 | 0.92480  |
| C | -8.34994 | -2.50602 | 0.38081  |
| C | -6.45667 | -3.23422 | 1.68832  |
| C | -8.96779 | -3.74132 | 0.58871  |
| H | -8.85519 | -1.76040 | -0.22772 |
| C | -7.07291 | -4.47135 | 1.89285  |
| H | -5.48540 | -3.04740 | 2.13975  |
| C | -8.34162 | -4.75302 | 1.34547  |
| H | -9.95536 | -3.91527 | 0.16859  |
| H | -6.55319 | -5.23311 | 2.46888  |
| C | 5.58637  | 2.61362  | -0.51698 |
| C | 6.26293  | 2.87328  | -1.72737 |
| C | 6.35491  | 2.31562  | 0.62801  |
| C | 7.66176  | 2.83655  | -1.79105 |
| H | 5.69402  | 3.07873  | -2.63084 |
| C | 7.75357  | 2.27664  | 0.56584  |
| H | 5.85735  | 2.13818  | 1.57846  |
| C | 8.41475  | 2.53739  | -0.64469 |
| H | 8.16262  | 3.03166  | -2.73457 |
| H | 8.32631  | 2.05138  | 1.46044  |
| H | 9.49884  | 2.50783  | -0.69412 |
| C | -8.99186 | -6.06845 | 1.55254  |
| C | -8.79559 | -6.79533 | 2.74580  |
| C | -9.82024 | -6.62812 | 0.55699  |

|   |           |          |          |
|---|-----------|----------|----------|
| C | -9.40620  | -8.04154 | 2.93663  |
| H | -8.18285  | -6.37408 | 3.53915  |
| C | -10.43301 | -7.87321 | 0.74681  |
| H | -9.96495  | -6.10185 | -0.38336 |
| C | -10.22851 | -8.58706 | 1.93812  |
| H | -9.24764  | -8.58169 | 3.86520  |
| H | -11.06094 | -8.28925 | -0.03528 |
| H | -10.70161 | -9.55295 | 2.08599  |

Neutral triplet state (-1900.48965, -1899.820754, -1899.929948)

|   |          |          |          |
|---|----------|----------|----------|
| C | -6.48008 | -1.01747 | 0.65611  |
| C | -5.07739 | -0.88504 | 0.66947  |
| C | -4.48122 | 0.33325  | 0.38026  |
| C | -5.24289 | 1.48316  | 0.07595  |
| C | -6.64186 | 1.34201  | 0.03141  |
| C | -7.24634 | 0.11880  | 0.32488  |
| C | -3.18186 | 2.72540  | -0.27201 |
| C | -2.45089 | 1.55256  | 0.00918  |
| C | -1.06257 | 1.52777  | -0.02108 |
| H | -0.56741 | 0.58066  | 0.17314  |
| C | -0.33273 | 2.69198  | -0.32173 |
| C | -1.05798 | 3.87936  | -0.56094 |
| C | -2.45228 | 3.89770  | -0.52952 |
| H | -4.42878 | -1.73439 | 0.86331  |
| H | -7.25307 | 2.19595  | -0.24273 |
| H | -2.98598 | 4.82778  | -0.69464 |
| H | -8.33009 | 0.05450  | 0.30595  |
| H | -0.52690 | 4.80909  | -0.74246 |
| N | -4.59880 | 2.70252  | -0.22967 |
| C | -5.37286 | 3.87593  | -0.42074 |
| C | -6.15501 | 4.35677  | 0.71345  |
| C | -5.38537 | 4.56545  | -1.68113 |
| C | -6.83053 | 5.54911  | 0.61809  |
| H | -6.12700 | 3.79209  | 1.64156  |
| C | -6.12389 | 5.80745  | -1.76395 |
| C | -6.81786 | 6.29406  | -0.60817 |
| H | -7.37138 | 5.94010  | 1.47429  |
| H | -7.36367 | 7.23207  | -0.68125 |
| O | -3.08554 | 0.35684  | 0.35547  |
| C | -6.16883 | 6.49400  | -2.99331 |
| C | -4.76705 | 4.06299  | -2.84371 |
| C | -4.82474 | 4.77994  | -4.07645 |
| H | -4.32535 | 4.37522  | -4.95153 |
| C | -5.51052 | 5.98298  | -4.15066 |
| H | -5.55566 | 6.53657  | -5.08359 |
| H | -6.72972 | 7.42422  | -3.05439 |

|   |           |          |          |
|---|-----------|----------|----------|
| H | -4.24699  | 3.10890  | -2.80525 |
| C | 1.14411   | 2.67008  | -0.37211 |
| C | 1.85367   | 3.52862  | -1.23712 |
| C | 1.89007   | 1.78426  | 0.43274  |
| C | 3.24904   | 3.49971  | -1.29747 |
| H | 1.31115   | 4.21267  | -1.88493 |
| C | 3.28504   | 1.75600  | 0.37201  |
| H | 1.37881   | 1.12112  | 1.12615  |
| C | 3.99529   | 2.61164  | -0.49551 |
| H | 3.76312   | 4.18753  | -1.96404 |
| H | 3.82673   | 1.04673  | 0.99283  |
| C | -7.11750  | -2.31847 | 0.94842  |
| C | -8.32437  | -2.69602 | 0.32407  |
| C | -6.52883  | -3.22898 | 1.85003  |
| C | -8.91241  | -3.93584 | 0.58493  |
| H | -8.79679  | -2.02588 | -0.38955 |
| C | -7.11899  | -4.46733 | 2.11251  |
| H | -5.60845  | -2.96136 | 2.36305  |
| C | -8.32131  | -4.84901 | 1.48219  |
| H | -9.84943  | -4.19089 | 0.09630  |
| H | -6.62912  | -5.15385 | 2.79826  |
| C | 5.47511   | 2.57542  | -0.56070 |
| C | 6.15483   | 2.84071  | -1.76808 |
| C | 6.23991   | 2.26967  | 0.58468  |
| C | 7.55366   | 2.80157  | -1.82855 |
| H | 5.58873   | 3.05174  | -2.67196 |
| C | 7.63856   | 2.22868  | 0.52570  |
| H | 5.73975   | 2.08757  | 1.53282  |
| C | 8.30303   | 2.49468  | -0.68191 |
| H | 8.05720   | 3.00075  | -2.76973 |
| H | 8.20879   | 1.99734  | 1.42027  |
| H | 9.38713   | 2.46303  | -0.72893 |
| C | -8.93946  | -6.16941 | 1.74653  |
| C | -8.83551  | -6.77574 | 3.01592  |
| C | -9.64036  | -6.85410 | 0.73178  |
| C | -9.41212  | -8.02839 | 3.26237  |
| H | -8.32292  | -6.25609 | 3.82181  |
| C | -10.21736 | -8.10689 | 0.97662  |
| H | -9.71210  | -6.41877 | -0.26200 |
| C | -10.10511 | -8.70071 | 2.24354  |
| H | -9.32661  | -8.47589 | 4.24796  |
| H | -10.74512 | -8.62157 | 0.17946  |
| H | -10.55075 | -9.67223 | 2.43364  |

Cation radical state (-1900.396651, -1899.723003, -1899.832029)

|   |          |          |         |
|---|----------|----------|---------|
| C | -6.38694 | -0.96130 | 0.61633 |
|---|----------|----------|---------|

|   |          |          |          |
|---|----------|----------|----------|
| C | -4.98437 | -0.87581 | 0.56192  |
| C | -4.37035 | 0.34367  | 0.32502  |
| C | -5.11862 | 1.53507  | 0.12923  |
| C | -6.52603 | 1.45037  | 0.18102  |
| C | -7.13882 | 0.23110  | 0.41733  |
| C | -3.05567 | 2.75895  | -0.16497 |
| C | -2.32675 | 1.55464  | 0.02709  |
| C | -0.94304 | 1.51978  | -0.03037 |
| H | -0.45443 | 0.55951  | 0.09554  |
| C | -0.21521 | 2.69841  | -0.27524 |
| C | -0.94483 | 3.90721  | -0.46216 |
| C | -2.32804 | 3.94220  | -0.41049 |
| H | -4.35148 | -1.74986 | 0.67236  |
| H | -7.12297 | 2.34570  | 0.04636  |
| H | -2.85690 | 4.87911  | -0.54725 |
| H | -8.22105 | 0.19980  | 0.47888  |
| H | -0.41258 | 4.83800  | -0.62385 |
| N | -4.44511 | 2.73096  | -0.10387 |
| C | -5.20515 | 3.94724  | -0.32638 |
| C | -5.54747 | 4.72555  | 0.76106  |
| C | -5.58444 | 4.28126  | -1.66017 |
| C | -6.30894 | 5.90789  | 0.56205  |
| H | -5.23548 | 4.42714  | 1.75771  |
| C | -6.35452 | 5.47532  | -1.84451 |
| C | -6.70306 | 6.26951  | -0.71353 |
| H | -6.57752 | 6.51750  | 1.41725  |
| H | -7.28874 | 7.17108  | -0.87239 |
| O | -2.98663 | 0.36119  | 0.26876  |
| C | -6.75619 | 5.84187  | -3.16130 |
| C | -5.23693 | 3.49084  | -2.79333 |
| C | -5.64173 | 3.87531  | -4.05938 |
| H | -5.37441 | 3.27137  | -4.92026 |
| C | -6.40842 | 5.05932  | -4.24723 |
| H | -6.71688 | 5.34312  | -5.24796 |
| H | -7.34057 | 6.74843  | -3.29507 |
| H | -4.65142 | 2.58410  | -2.66637 |
| C | 1.25572  | 2.68629  | -0.32732 |
| C | 1.97144  | 3.69383  | -1.01090 |
| C | 1.99997  | 1.66549  | 0.30407  |
| C | 3.36502  | 3.68191  | -1.05767 |
| H | 1.44156  | 4.48757  | -1.52881 |
| C | 3.39298  | 1.65592  | 0.25772  |
| H | 1.49199  | 0.87974  | 0.85559  |
| C | 4.10814  | 2.66499  | -0.42207 |
| H | 3.88160  | 4.48512  | -1.57552 |
| H | 3.93062  | 0.84500  | 0.74076  |

|   |           |          |          |
|---|-----------|----------|----------|
| C | -7.05889  | -2.24457 | 0.87616  |
| C | -8.37981  | -2.47995 | 0.43601  |
| C | -6.40037  | -3.28264 | 1.57070  |
| C | -9.01017  | -3.70069 | 0.67573  |
| H | -8.91681  | -1.71479 | -0.11714 |
| C | -7.03352  | -4.50064 | 1.81306  |
| H | -5.39161  | -3.13246 | 1.94511  |
| C | -8.35223  | -4.73845 | 1.36913  |
| H | -10.03277 | -3.84080 | 0.33654  |
| H | -6.49169  | -5.28319 | 2.33699  |
| C | 5.58771   | 2.65837  | -0.46039 |
| C | 6.28608   | 3.17515  | -1.57239 |
| C | 6.33396   | 2.13723  | 0.61816  |
| C | 7.68591   | 3.17052  | -1.60539 |
| H | 5.73571   | 3.55748  | -2.42833 |
| C | 7.73365   | 2.13367  | 0.58669  |
| H | 5.82159   | 1.75878  | 1.49910  |
| C | 8.41676   | 2.65021  | -0.52561 |
| H | 8.20501   | 3.56480  | -2.47352 |
| H | 8.29006   | 1.73664  | 1.43008  |
| H | 9.50197   | 2.64730  | -0.55079 |
| C | -9.02123  | -6.03383 | 1.62414  |
| C | -8.71937  | -6.78722 | 2.77859  |
| C | -9.97286  | -6.54748 | 0.71793  |
| C | -9.34808  | -8.01507 | 3.01840  |
| H | -8.01076  | -6.40221 | 3.50758  |
| C | -10.60174 | -7.77557 | 0.95642  |
| H | -10.20343 | -6.00061 | -0.19289 |
| C | -10.29186 | -8.51592 | 2.10820  |
| H | -9.10774  | -8.57644 | 3.91604  |
| H | -11.32454 | -8.15803 | 0.24237  |
| H | -10.77828 | -9.46859 | 2.29328  |

### 10-Phenylphenothiazine

Neutral ground state (-1146.281695, -1146.008636, -1146.06816)

|   |          |          |          |
|---|----------|----------|----------|
| C | -6.58770 | -0.89838 | 0.26473  |
| C | -5.26471 | -0.92861 | -0.16713 |
| C | -4.57551 | 0.25460  | -0.41864 |
| C | -5.17878 | 1.50321  | -0.19179 |
| C | -6.51014 | 1.51925  | 0.24285  |
| C | -7.20663 | 0.33235  | 0.45561  |
| C | -3.06001 | 2.75123  | -0.19253 |
| C | -2.25958 | 1.62020  | -0.42455 |
| C | -0.88944 | 1.64991  | -0.17898 |
| H | -0.30341 | 0.74990  | -0.35531 |
| C | -0.27376 | 2.82088  | 0.25455  |

|   |          |          |          |
|---|----------|----------|----------|
| C | -1.05173 | 3.95609  | 0.45482  |
| C | -2.42827 | 3.92162  | 0.24699  |
| H | -7.12523 | -1.82585 | 0.44251  |
| H | -4.76111 | -1.87841 | -0.33709 |
| H | -7.01417 | 2.46673  | 0.40801  |
| H | 0.79872  | 2.84305  | 0.42727  |
| H | -3.01213 | 4.82025  | 0.42159  |
| H | -8.24191 | 0.38022  | 0.78394  |
| H | -0.59290 | 4.88399  | 0.78734  |
| S | -2.96786 | 0.17088  | -1.16624 |
| N | -4.45461 | 2.69640  | -0.41565 |
| C | -5.18153 | 3.93337  | -0.44043 |
| C | -5.56411 | 4.57027  | 0.74058  |
| C | -5.49587 | 4.49343  | -1.67506 |
| C | -6.26425 | 5.77135  | 0.68135  |
| H | -5.30923 | 4.11882  | 1.69844  |
| C | -6.19583 | 5.69740  | -1.73158 |
| H | -5.18716 | 3.97780  | -2.58196 |
| C | -6.57958 | 6.33582  | -0.55477 |
| H | -6.56338 | 6.26815  | 1.60090  |
| H | -6.44063 | 6.13572  | -2.69583 |
| H | -7.12665 | 7.27429  | -0.59867 |

Neutral triplet state (-1146.183574, -1145.913724, -1145.975536)

|   |          |          |          |
|---|----------|----------|----------|
| C | -6.68778 | -0.87930 | 0.21538  |
| C | -5.33056 | -0.94291 | 0.32643  |
| C | -4.51964 | 0.21660  | 0.12819  |
| C | -5.18749 | 1.50169  | -0.13396 |
| C | -6.58268 | 1.51430  | -0.30501 |
| C | -7.33526 | 0.36606  | -0.14736 |
| C | -3.04356 | 2.72514  | -0.08668 |
| C | -2.22553 | 1.56860  | -0.23730 |
| C | -0.82772 | 1.69243  | -0.28023 |
| H | -0.23165 | 0.78921  | -0.40095 |
| C | -0.21492 | 2.92170  | -0.15040 |
| C | -1.01423 | 4.07030  | 0.02024  |
| C | -2.38736 | 3.97490  | 0.04993  |
| H | -7.29105 | -1.76448 | 0.40284  |
| H | -4.83726 | -1.88632 | 0.56110  |
| H | -7.08776 | 2.45193  | -0.52646 |
| H | 0.86844  | 2.99836  | -0.16612 |
| H | -2.98012 | 4.87567  | 0.17987  |
| H | -8.41225 | 0.40049  | -0.28274 |
| H | -0.54930 | 5.04640  | 0.13232  |
| S | -2.88711 | -0.02934 | -0.41565 |
| N | -4.43176 | 2.66544  | -0.11815 |

|   |          |         |          |
|---|----------|---------|----------|
| C | -5.15236 | 3.91040 | -0.18928 |
| C | -5.68536 | 4.45541 | 0.97341  |
| C | -5.31555 | 4.53322 | -1.42165 |
| C | -6.39376 | 5.65187 | 0.89947  |
| H | -5.54105 | 3.94086 | 1.92144  |
| C | -6.02956 | 5.72702 | -1.48914 |
| H | -4.88628 | 4.07948 | -2.31289 |
| C | -6.56729 | 6.28523 | -0.33059 |
| H | -6.81058 | 6.08855 | 1.80333  |
| H | -6.16672 | 6.21980 | -2.44821 |
| H | -7.12401 | 7.21724 | -0.38591 |

Cation radical state (-1146.094901, -1145.821109, -1145.881181)

|   |          |          |          |
|---|----------|----------|----------|
| C | -6.70948 | -0.88018 | -0.02749 |
| C | -5.33437 | -0.95929 | 0.01234  |
| C | -4.55431 | 0.20578  | -0.01625 |
| C | -5.16662 | 1.48158  | -0.08401 |
| C | -6.57648 | 1.53393  | -0.12494 |
| C | -7.32658 | 0.37835  | -0.09738 |
| C | -3.03936 | 2.73200  | -0.08445 |
| C | -2.22145 | 1.57704  | -0.02506 |
| C | -0.82370 | 1.69308  | -0.00884 |
| H | -0.22080 | 0.78916  | 0.03377  |
| C | -0.22611 | 2.93416  | -0.04877 |
| C | -1.02693 | 4.08512  | -0.10237 |
| C | -2.40136 | 3.99114  | -0.11951 |
| H | -7.30797 | -1.78555 | -0.00611 |
| H | -4.83671 | -1.92456 | 0.06582  |
| H | -7.07803 | 2.49392  | -0.17981 |
| H | 0.85606  | 3.01769  | -0.03780 |
| H | -2.99759 | 4.89605  | -0.16085 |
| H | -8.40941 | 0.45111  | -0.13029 |
| H | -0.56476 | 5.06728  | -0.13257 |
| S | -2.83943 | -0.04103 | 0.03502  |
| N | -4.42570 | 2.65582  | -0.11132 |
| C | -5.15968 | 3.90248  | -0.18134 |
| C | -5.54235 | 4.52670  | 0.99937  |
| C | -5.45901 | 4.43635  | -1.42896 |
| C | -6.24854 | 5.72404  | 0.92400  |
| H | -5.28873 | 4.07693  | 1.95694  |
| C | -6.16513 | 5.63411  | -1.49172 |
| H | -5.14201 | 3.91662  | -2.33068 |
| C | -6.55830 | 6.27531  | -0.31820 |
| H | -6.55606 | 6.22550  | 1.83741  |
| H | -6.40760 | 6.06563  | -2.45886 |

|   |          |         |          |
|---|----------|---------|----------|
| H | -7.11062 | 7.20965 | -0.37179 |
|---|----------|---------|----------|

### 1-Naphthalene-10-phenothiazine

Neutral ground state (-1299.842414, -1299.519779, -1299.585155)

|   |          |          |          |
|---|----------|----------|----------|
| C | -6.60246 | -0.89676 | 0.20226  |
| C | -5.28644 | -0.91235 | -0.25127 |
| C | -4.59130 | 0.27856  | -0.44503 |
| C | -5.18098 | 1.51503  | -0.13413 |
| C | -6.50458 | 1.51677  | 0.32276  |
| C | -7.20849 | 0.32511  | 0.47579  |
| C | -3.05244 | 2.75886  | -0.12750 |
| C | -2.26255 | 1.64062  | -0.44045 |
| C | -0.88409 | 1.66252  | -0.24442 |
| H | -0.30359 | 0.77285  | -0.48145 |
| C | -0.25364 | 2.81589  | 0.21446  |
| C | -1.02320 | 3.94071  | 0.49283  |
| C | -2.40652 | 3.91104  | 0.33746  |
| H | -7.14510 | -1.82898 | 0.33357  |
| H | -4.79422 | -1.85448 | -0.48527 |
| H | -6.99227 | 2.45896  | 0.55538  |
| H | 0.82468  | 2.83274  | 0.34679  |
| H | -2.98904 | 4.79603  | 0.57596  |
| H | -8.23793 | 0.36088  | 0.82346  |
| H | -0.55177 | 4.85414  | 0.84697  |
| N | -4.45330 | 2.71434  | -0.28990 |
| C | -5.17356 | 3.94572  | -0.39415 |
| C | -5.58174 | 4.62856  | 0.72724  |
| C | -5.45870 | 4.44405  | -1.69707 |
| C | -6.29727 | 5.83965  | 0.60942  |
| H | -5.34726 | 4.22096  | 1.70945  |
| C | -6.18360 | 5.66857  | -1.80897 |
| C | -6.59170 | 6.34629  | -0.63278 |
| H | -6.61215 | 6.36557  | 1.50681  |
| H | -7.14393 | 7.27917  | -0.73337 |
| C | -6.47701 | 6.17626  | -3.10017 |
| C | -5.05162 | 3.77324  | -2.87823 |
| C | -5.35190 | 4.29378  | -4.11425 |
| H | -5.03473 | 3.77093  | -5.01333 |
| C | -6.07163 | 5.50559  | -4.22813 |
| H | -6.30151 | 5.90475  | -5.21296 |
| H | -7.03105 | 7.11028  | -3.17876 |
| H | -4.49624 | 2.84082  | -2.79019 |
| S | -2.99575 | 0.22430  | -1.22228 |

Neutral triplet state (-1299.747767, -1299.429582, -1299.497632)

|   |          |          |         |
|---|----------|----------|---------|
| C | -6.58547 | -0.97915 | 0.48492 |
|---|----------|----------|---------|



|   |          |          |          |
|---|----------|----------|----------|
| C | -5.26734 | -1.00394 | 0.03702  |
| C | -4.60388 | 0.17930  | -0.27675 |
| C | -5.23192 | 1.42295  | -0.09377 |
| C | -6.56385 | 1.43416  | 0.33775  |
| C | -7.23216 | 0.24518  | 0.61703  |
| C | -3.13560 | 2.70921  | -0.24635 |
| C | -2.31536 | 1.59596  | -0.48074 |
| C | -0.93307 | 1.68824  | -0.33327 |
| H | -0.32345 | 0.80414  | -0.50986 |
| C | -0.33824 | 2.90000  | 0.00621  |
| C | -1.14357 | 4.01375  | 0.22534  |
| C | -2.52759 | 3.91764  | 0.11621  |
| H | -7.10146 | -1.90784 | 0.71290  |
| H | -4.75004 | -1.95156 | -0.10060 |
| H | -7.08982 | 2.37869  | 0.44605  |
| H | 0.74198  | 2.96910  | 0.10044  |
| H | -3.14441 | 4.79237  | 0.30951  |
| H | -8.26790 | 0.28584  | 0.94455  |
| H | -0.69852 | 4.96761  | 0.49699  |
| N | -4.54048 | 2.62047  | -0.37652 |
| C | -5.27076 | 3.83636  | -0.46081 |
| C | -5.77627 | 4.46490  | 0.74751  |
| C | -5.41954 | 4.45508  | -1.73164 |
| C | -6.41362 | 5.66120  | 0.67179  |
| H | -5.60168 | 3.96831  | 1.70012  |
| C | -6.10486 | 5.72401  | -1.79424 |
| C | -6.59925 | 6.30266  | -0.60115 |
| H | -6.78015 | 6.14867  | 1.57139  |
| H | -7.12145 | 7.25587  | -0.65607 |
| C | -6.26534 | 6.33849  | -3.04286 |
| C | -4.94211 | 3.88227  | -2.91588 |
| C | -5.11379 | 4.53740  | -4.17670 |
| H | -4.72427 | 4.06789  | -5.07615 |
| C | -5.76263 | 5.73827  | -4.23891 |
| H | -5.90249 | 6.24584  | -5.18981 |
| H | -6.78615 | 7.29318  | -3.09516 |
| H | -4.44179 | 2.91604  | -2.87217 |
| S | -3.02226 | 0.08240  | -1.07977 |

Cation radical state (-1299.654881, -1299.331714, -1299.397442)

|   |          |          |          |
|---|----------|----------|----------|
| C | -6.70545 | -0.87476 | -0.04831 |
| C | -5.33271 | -0.95500 | 0.04079  |
| C | -4.54937 | 0.20807  | 0.00746  |
| C | -5.15699 | 1.48196  | -0.11212 |
| C | -6.56413 | 1.53551  | -0.20332 |
| C | -7.31734 | 0.38222  | -0.17243 |

|   |          |          |          |
|---|----------|----------|----------|
| C | -3.02757 | 2.72876  | -0.10808 |
| C | -2.21417 | 1.57517  | 0.00948  |
| C | -0.81620 | 1.68914  | 0.04248  |
| H | -0.21660 | 0.78665  | 0.13348  |
| C | -0.21505 | 2.92596  | -0.04393 |
| C | -1.01196 | 4.07518  | -0.16262 |
| C | -2.38616 | 3.98312  | -0.19319 |
| H | -7.30624 | -1.77852 | -0.02429 |
| H | -4.83956 | -1.91931 | 0.13636  |
| H | -7.05992 | 2.49562  | -0.29943 |
| H | 0.86705  | 3.00787  | -0.02075 |
| H | -2.98044 | 4.88607  | -0.28283 |
| H | -8.39816 | 0.45524  | -0.24586 |
| H | -0.54675 | 5.05380  | -0.23376 |
| N | -4.41436 | 2.65590  | -0.14849 |
| C | -5.14496 | 3.90168  | -0.25089 |
| C | -5.52091 | 4.54120  | 0.90219  |
| C | -5.44643 | 4.41213  | -1.54020 |
| C | -6.23616 | 5.75502  | 0.82456  |
| H | -5.26433 | 4.10573  | 1.86558  |
| C | -6.16998 | 5.64043  | -1.60278 |
| C | -6.55126 | 6.28863  | -0.40119 |
| H | -6.53330 | 6.25937  | 1.73935  |
| H | -7.10419 | 7.22359  | -0.46865 |
| C | -6.49095 | 6.17936  | -2.87397 |
| C | -5.06817 | 3.76600  | -2.74290 |
| C | -5.39714 | 4.31743  | -3.95754 |
| H | -5.10362 | 3.81451  | -4.87527 |
| C | -6.11447 | 5.53369  | -4.02562 |
| H | -6.36651 | 5.95539  | -4.99507 |
| H | -7.04457 | 7.11540  | -2.91676 |
| H | -4.51373 | 2.83007  | -2.70250 |
| S | -2.83779 | -0.03733 | 0.12756  |

### 10-Phenylphenoxazine (from X-ray crystal analysis)

Doi: 10.1039/C4RA09593F

Neutral ground state structure

|   |          |          |          |
|---|----------|----------|----------|
| O | 7.49400  | 11.36400 | 10.45100 |
| N | 7.49400  | 8.56300  | 10.45100 |
| C | 5.12200  | 8.63800  | 11.02300 |
| C | 9.86500  | 8.63800  | 9.87800  |
| H | 5.07600  | 7.70900  | 11.02700 |
| H | 9.91100  | 7.70900  | 9.87400  |
| C | 4.00000  | 9.37300  | 11.31400 |
| C | 10.98700 | 9.37300  | 9.58700  |

|   |          |          |          |
|---|----------|----------|----------|
| H | 3.20400  | 8.93700  | 11.51900 |
| H | 11.78400 | 8.93700  | 9.38200  |
| C | 4.04500  | 10.74000 | 11.30600 |
| C | 10.94200 | 10.74000 | 9.59500  |
| H | 3.28200  | 11.23300 | 11.50300 |
| H | 11.70600 | 11.23300 | 9.39800  |
| C | 5.21700  | 11.37900 | 11.00700 |
| C | 9.77000  | 11.37900 | 9.89500  |
| H | 5.24900  | 12.30800 | 10.99800 |
| H | 9.73900  | 12.30800 | 9.90300  |
| C | 6.34000  | 10.65900 | 10.71900 |
| C | 8.64700  | 10.65900 | 10.18200 |
| C | 6.31800  | 9.25900  | 10.72400 |
| C | 8.67000  | 9.25900  | 10.17700 |
| C | 7.49400  | 7.12800  | 10.45100 |
| C | 7.72900  | 6.45800  | 11.61600 |
| C | 7.25800  | 6.45800  | 9.28500  |
| H | 7.89200  | 6.92400  | 12.40400 |
| H | 7.09500  | 6.92400  | 8.49800  |
| C | 7.72300  | 5.08000  | 11.60800 |
| C | 7.26400  | 5.08000  | 9.29300  |
| H | 7.87400  | 4.61200  | 12.39700 |
| H | 7.11300  | 4.61200  | 8.50400  |
| C | 7.49400  | 4.39900  | 10.45100 |
| H | 7.49400  | 3.47000  | 10.45100 |

### 10-Phenylphenothiazine (from X-ray crystal analysis)

Doi: 10.1107/S0108270185007144

Neutral ground state structure 1

|   |          |          |          |
|---|----------|----------|----------|
| S | 18.09300 | 9.94900  | 14.26700 |
| N | 15.27100 | 10.89100 | 13.71900 |
| C | 17.18900 | 11.12700 | 15.22800 |
| C | 17.76200 | 11.63600 | 16.36000 |
| C | 17.05000 | 12.47900 | 17.20300 |
| C | 15.74900 | 12.81200 | 16.85100 |
| C | 15.18100 | 12.32400 | 15.71200 |
| C | 15.85900 | 11.45500 | 14.86600 |
| C | 17.40500 | 10.27600 | 12.69000 |
| C | 18.17800 | 10.06000 | 11.54600 |
| C | 17.63600 | 10.11300 | 10.30000 |
| C | 16.28200 | 10.39800 | 10.16200 |
| C | 15.50900 | 10.66600 | 11.28400 |
| C | 16.05100 | 10.63000 | 12.55700 |
| C | 13.83800 | 11.10100 | 13.53900 |
| C | 12.95900 | 10.13000 | 13.97200 |
| C | 11.59800 | 10.29600 | 13.80700 |

|   |          |          |          |
|---|----------|----------|----------|
| C | 11.11000 | 11.46400 | 13.22500 |
| C | 11.99100 | 12.44600 | 12.81100 |
| C | 13.35900 | 12.27400 | 12.96400 |
| H | 18.62200 | 11.36100 | 16.61600 |
| H | 17.42000 | 12.87100 | 18.01800 |
| H | 15.24700 | 13.42300 | 17.39200 |
| H | 14.22200 | 12.56500 | 15.44600 |
| H | 19.04000 | 9.82600  | 11.73100 |
| H | 18.15300 | 9.93300  | 9.52600  |
| H | 15.87400 | 10.32600 | 9.26700  |
| H | 14.57600 | 10.84500 | 11.15900 |
| H | 13.29100 | 9.36700  | 14.38400 |
| H | 10.97300 | 9.60000  | 14.11200 |
| H | 10.24800 | 11.59400 | 13.10500 |
| H | 11.61900 | 13.29600 | 12.47900 |
| H | 14.01100 | 12.97700 | 12.68300 |

Neutral ground state structure 2

|   |          |          |          |
|---|----------|----------|----------|
| S | 13.38200 | 10.31300 | 6.29200  |
| N | 13.07100 | 7.28600  | 6.66400  |
| C | 13.08200 | 9.45400  | 7.80000  |
| C | 12.89900 | 10.20500 | 8.94100  |
| C | 12.41500 | 9.63300  | 10.10400 |
| C | 12.20300 | 8.27200  | 10.12500 |
| C | 12.45400 | 7.49000  | 9.01700  |
| C | 12.90100 | 8.05800  | 7.81000  |
| C | 14.09200 | 9.04400  | 5.30600  |
| C | 14.84000 | 9.43400  | 4.18100  |
| C | 15.35000 | 8.48400  | 3.32600  |
| C | 15.17300 | 7.14600  | 3.59800  |
| C | 14.44000 | 6.75200  | 4.71700  |
| C | 13.87900 | 7.69200  | 5.57000  |
| C | 12.73500 | 5.87600  | 6.72800  |
| C | 11.54800 | 5.45400  | 6.17300  |
| C | 11.20600 | 4.10600  | 6.24600  |
| C | 12.05100 | 3.20500  | 6.84800  |
| C | 13.25200 | 3.63300  | 7.38400  |
| C | 13.59300 | 4.97800  | 7.32700  |
| H | 13.11900 | 11.07900 | 8.95400  |
| H | 12.31000 | 10.19000 | 10.87300 |
| H | 11.86700 | 7.85800  | 10.90000 |
| H | 12.29000 | 6.55600  | 8.98200  |
| H | 14.99800 | 10.39200 | 4.04200  |
| H | 15.76900 | 8.71100  | 2.58600  |
| H | 15.49000 | 6.44000  | 2.99400  |
| H | 14.32400 | 5.83100  | 4.81700  |

|   |          |         |         |
|---|----------|---------|---------|
| H | 10.96100 | 6.07800 | 5.75600 |
| H | 10.41800 | 3.78300 | 5.81100 |
| H | 11.85200 | 2.26100 | 6.81800 |
| H | 13.86400 | 3.00700 | 7.78400 |
| H | 14.34400 | 5.28800 | 7.71600 |

## 8. References

---

1. Liu, N.; Wang, B.; Chen, W.; Liu, C.; Wang, X.; Hu, Y. *RSC Adv.* **2014**, *4*, 51133-51139
2. Pan, X.; Lamson, M.; Yan, J.; Matyjaszewski, K. *ACS Macro Letters.* **2015**, *2*, 192-196
3. Zhu, Y.; Kulkarni, A. P.; Wu, P.-T.; Jenekhe, S. A. *Chem. Mater.* **2008**, *20*, 4200-4211.
4. He, H.; Zapol, P.; Curtiss, L. A. *The Journal of Physical Chemistry C* **2010**, *114*, 21474.
5. Tossell, J. A. *Computational and Theoretical Chemistry* **2011**, 977, 123.
6. Winget, P.; Cramer, C. J.; Truhlar, D. G. *Theoretical Chemistry Accounts: Theory, Computation, and Modeling (Theoretica Chimica Acta)* **2004**, *112*, 217.
7. Zhao, Y.; Truhlar, D. *Theoretical Chemistry Accounts* **2008**, *120*, 215.
8. Spackman, M. A. *J. Comput. Chem.* **1996**, *17*, 1.
